# Supplementary material for: Pathogenic mycobacteria suppress host antimicrobial peptides by dehydrogenating L-alanine
Source: Research Square preprint supplement (doi:10.21203/rs.3.rs-3367542/v1), 2023-09-22
Supplement: Supplementary file 1 [file 1e70fb9f77ad9d6925632c60.xlsx]

## Sheet: Sheet1
Supplementary Table 4. Top 50 compounds information of virtual screening
Item	Screening ID	Catalog_ID	docking_score	Drug_Names	MW	LogP	TPSA
1	GWP-040	Z33305749	-12.0957	4-(2,5-dimethylphenyl)-N-(4-methoxy-3-(N-(4-methoxyphenyl)sulfamoyl)phenyl)-4-oxobutanamide	496.58	3.98922	110.8
2	GWP-041	Z1637284029	-10.5209	3-ethyl-N-(5-(3-fluorobenzyl)-1H-1,2,4-triazol-3-yl)-1-methyl-1H-pyrazole-4-carboxamide	328.351	2.72145	88.49
3	GWP-042	Z1637284216	-10.3503	(S)-N-(5-(3-fluorobenzyl)-1H-1,2,4-triazol-3-yl)tetrahydrofuran-2-carboxamide	290.298	2.05115	79.9
4	GWP-043	Z1637284177	-10.2405	4,4,4-trifluoro-N-(5-(3-fluorobenzyl)-1H-1,2,4-triazol-3-yl)butanamide	316.26	2.94278	70.67
5	GWP-044	Z31335933	-10.2286	(R)-1-((4-chlorobenzyl)oxy)-3-(2-((2-hydroxyethyl)amino)-1H-benzo[d]imidazol-1-yl)propan-2-ol	375.85	2.60131	79.54
6	GWP-045	Z46383486	-10.0388	(R)-N-(cyclohexylcarbamoyl)-2-(methyl(2-oxo-2-((2,3,4-trifluorophenyl)amino)ethyl)amino)propanamide	414.429	2.44837	90.54
7	GWP-046	Z1763232877	-9.98724	N-(((2S,4S)-1-(2-amino-2-oxoethyl)-4-fluoropyrrolidin-2-yl)methyl)-5-cyano-1H-pyrrole-3-carboxamide	293.302	-1.19781	115.01
8	GWP-047	Z239400926	-9.92232	N-(3-(2-(3,4-dimethoxybenzamido)acetamido)phenyl)thiophene-2-carboxamide	439.49	2.64927	105.76
9	GWP-048	Z1637284402	-9.78273	N-(5-(3-fluorobenzyl)-1H-1,2,4-triazol-3-yl)-3-(1H-1,2,4-triazol-1-yl)propanamide	315.312	1.26044	101.38
10	GWP-049	Z52844253	-9.75594	ethyl 2,4-dimethyl-5-(2-((3-(trifluoromethyl)phenyl)amino)acetyl)-1H-pyrrole-3-carboxylate	368.356	3.62925	71.19
11	GWP-050	Z167284852	-9.74344	N-(4-(2-((1-ethyl-1H-benzo[d]imidazol-2-yl)amino)-2-oxoethyl)thiazol-2-yl)furan-2-carboxamide	395.44	3.47731	102.05
12	GWP-051	Z30691842	-9.68624	N-(4-((1H-benzo[d]imidazol-2-yl)thio)phenyl)-2-(4-chlorophenoxy)acetamide	409.89	5.49116	67.01
13	GWP-052	Z33303501	-9.68543	N-(3-(N-(4-ethoxyphenyl)sulfamoyl)-4-methoxyphenyl)quinoline-2-carboxamide	477.54	4.13777	106.62
14	GWP-053	Z16364986	-9.67472	2-((3-fluorophenyl)amino)-2-oxoethyl 2-((2-((4-fluorophenyl)amino)-2-oxoethyl)thio)benzoate	456.46	4.40358	84.5
15	GWP-054	Z235259172	-9.62471	N-(3-(3-(4-chlorophenyl)ureido)phenyl)furan-2-carboxamide	355.78	3.87483	83.37
16	GWP-055	Z30529605	-9.60755	(R)-2,4-dichloro-N-(1-((3-(N-(4-methoxyphenyl)sulfamoyl)-4-methylphenyl)amino)-4-methyl-1-oxopentan-2-yl)benzamide	578.51	5.83423	113.6
17	GWP-056	Z44606769	-9.58835	3-(3-(2-fluorophenyl)ureido)-N-(4-methoxyphenyl)-4-methylbenzenesulfonamide	429.47	4.10477	96.53
18	GWP-057	Z33217998	-9.57284	N-(2-((5-(N-(4-chlorophenyl)sulfamoyl)-2-methoxyphenyl)amino)-2-oxoethyl)-2-fluorobenzamide	491.92	3.03659	113.6
19	GWP-058	Z31739072	-9.55656	N-(2-((3-(N-(3-chlorophenyl)sulfamoyl)phenyl)amino)-2-oxoethyl)benzo[d][1,3]dioxole-5-carboxamide	487.91	2.67479	122.83
20	GWP-059	Z31808279	-9.55533	3-acetamido-N-(3-(N-(4-chlorophenyl)sulfamoyl)phenyl)benzamide	443.9	3.39455	104.37
21	GWP-060	Z739395842	-9.51493	3-fluoro-N-(3-((2-(2-fluorophenoxy)acetamido)methyl)phenyl)benzamide	396.394	3.81205	67.43
22	GWP-061	Z169860344	-9.51231	(R)-diethyl 2-(3-(2-chlorobenzamido)-3-phenylpropanamido)malonate	460.91	3.04528	110.8
23	GWP-062	Z991645442	-9.50888	N-(6-(3-carbamoylphenoxy)pyridin-3-yl)-6-methylnicotinamide	348.362	1.70654	107.2
24	GWP-063	Z236063054	-9.50315	N-(3-(2-(3-fluoro-4-methoxyphenyl)acetamido)phenyl)furan-2-carboxamide	368.364	3.18246	80.57
25	GWP-064	Z63977698	-9.48338	N-(4-(2-((4-methylbenzo[d]thiazol-2-yl)amino)-2-oxoethyl)thiazol-2-yl)benzamide	408.49	5.20397	83.98
26	GWP-065	Z235259174	-9.46285	N-(3-(3-(3-chlorophenyl)ureido)phenyl)furan-2-carboxamide	355.78	3.87483	83.37
27	GWP-066	Z94599842	-9.45705	(S)-N-(1-(1H-benzo[d]imidazol-2-yl)-2-phenylethyl)-4-(1H-indol-3-yl)butanamide	422.532	5.32462	73.57
28	GWP-067	Z744066764	-9.43683	N-cyclopropyl-2-(4-(3-(naphthalen-1-yl)ureido)-1H-pyrazol-1-yl)acetamide	349.394	1.89627	88.05
29	GWP-068	Z768478516	-9.42173	N-cyclopropyl-4-methyl-3-(2-(quinolin-8-yl)acetamido)benzamide	359.429	3.25625	71.09
30	GWP-069	Z146351380	-9.40582	(R)-isopropyl 3-(2-chlorophenyl)-3-(3-(N-cyclopropylsulfamoyl)-4-methoxybenzamido)propanoate	494.99	3.20772	110.8
31	GWP-070	Z436514772	-9.39272	1-(4-methyl-3-(3-(pyridin-2-ylmethyl)ureido)phenyl)-3-phenylurea	375.432	3.34819	95.15
32	GWP-071	Z1279090597	-9.37446	N-(2-(1H-benzo[d]imidazol-2-yl)ethyl)-4-hydroxy-1-(4-isopropylphenyl)-1H-pyrazole-3-carboxamide	389.459	3.87313	95.83
33	GWP-072	Z30691925	-9.36027	N-(4-((1H-benzo[d]imidazol-2-yl)thio)phenyl)-2-(o-tolyloxy)acetamide	389.47	5.40054	67.01
34	GWP-073	Z146821974	-9.34442	2,4-dichloro-N-(2-((3-(cyclopropylcarbamoyl)phenyl)amino)-2-oxoethyl)benzamide	406.26	2.70782	87.3
35	GWP-074	Z115134048	-9.33983	N-(3-((2-(morpholine-4-carbonyl)benzofuran-3-yl)amino)-3-oxopropyl)thiophene-3-carboxamide	427.48	1.78592	100.88
36	GWP-075	Z1033336038	-9.29871	(R)-1-(3-(3-(2-fluorophenyl)ureido)propyl)piperidine-3-carboxamide	322.384	0.744468	87.46
37	GWP-076	Z51098082	-9.29504	1-(4-acetyl-3,5-dimethyl-1H-pyrrol-2-yl)-2-((6-bromonaphthalen-2-yl)oxy)ethanone	400.272	4.07654	59.16
38	GWP-077	Z70972545	-9.28753	N-(3-((2-((3-chloro-2-methylphenyl)amino)-2-oxoethyl)amino)-3-oxopropyl)-3-methylbenzamide	387.86	2.72246	87.3
39	GWP-078	Z26604040	-9.2645	3-benzyl-N-(2-((3,4-difluorophenyl)amino)-2-oxoethyl)-4-oxo-3,4-dihydrophthalazine-1-carboxamide	448.43	3.3572	90.87
40	GWP-079	Z440920088	-9.2325	(R)-N-(1-((2-((2-cyano-3-fluorophenyl)amino)ethyl)amino)-1-oxo-3-phenylpropan-2-yl)benzamide	430.483	3.44067	94.02
41	GWP-080	Z87616782	-9.2223	3-(N-cyclopropylsulfamoyl)-N-(2,3-dihydro-1H-inden-5-yl)-4-methoxybenzamide	386.47	3.21042	84.5
42	GWP-081	Z87629796	-9.21329	N-(9H-fluoren-3-yl)-4-methoxy-3-(N-(p-tolyl)sulfamoyl)benzamide	484.57	5.67432	84.5
43	GWP-082	Z133779924	-9.21104	N-(1-acetylindolin-5-yl)-2-((5-nitro-2-(phenylamino)phenyl)amino)acetamide	445.479	2.87988	116.61
44	GWP-083	Z56876729	-9.20707	2-((4-bromo-2,5-dimethylphenyl)thio)-N-(3-(N-(3,4,5,6-tetrahydro-2H-azepin-7-yl)sulfamoyl)phenyl)acetamide	524.49	4.94513	87.63
45	GWP-084	Z33332454	-9.20514	2-fluoro-N-(2-((3-(4-fluorophenylsulfonamido)-4-methoxyphenyl)amino)-2-oxoethyl)benzamide	475.47	2.57525	113.6
46	GWP-085	Z235354605	-9.1642	ethyl 2-((2-(benzylcarbamoyl)phenyl)thio)-5-(4-bromobenzoyl)-1H-pyrrole-3-carboxylate	563.47	6.63835	88.26
47	GWP-086	Z82461054	-9.13189	N-(2-(1H-indol-3-yl)ethyl)-5-(N-(2-fluorophenyl)sulfamoyl)-2,3-dimethoxybenzamide	497.54	3.47448	109.52
48	GWP-087	Z237162424	-9.12216	5-(N-(2-fluorophenyl)sulfamoyl)-N-(2-(imidazo[1,2-a]pyridin-2-yl)ethyl)-2,3-dimethoxybenzamide	498.53	2.19185	111.03
49	GWP-088	Z91042435	-9.11964	1-ethyl-N-((1-ethyl-1H-benzo[d]imidazol-2-yl)methyl)-2,3-dioxo-1,2,3,4-tetrahydroquinoxaline-6-carboxamide	391.431	1.59118	96.33
50	GWP-089	Z146821926	-9.11115	N-cyclopropyl-3-(2-(4-(trifluoromethyl)benzamido)acetamido)benzamide	405.377	2.37758	87.3
