# Supplementary material for: Pathogenic mycobacteria suppress host antimicrobial peptides by dehydrogenating L-alanine
Source: Research Square preprint supplement (doi:10.21203/rs.3.rs-3367542/v1), 2023-09-22
Supplement: Supplementary file 3 [file b73f7668a0758bc7b17cfa57.xlsx]

## Sheet: Sheet2
Supplementary Table 2. Metabolite profiling by GC-MS (peak area) in sera of Control and H37Rv-infected mice
Name	Control-1	Control-2	Control-3	Control-4	H37Rv-1	H37Rv-2	H37Rv-3	H37Rv-4
(S)-Mandelic acid	71852.4	170776	131856	98261.7		116839	57331.6
Sitosterol	247931	166108	227858	126927	238843	90518.3	248693	90925.4
1,2-Cyclohexanedione	3.96407e+06	5.96302e+06	5.33605e+06	4.81366e+06	5.19335e+06	5.04981e+06	4.84035e+06	6.68239e+06
1,3-diaminopropane	668843	1.7953e+06		6.28953e+06	788733
1,4-Cyclohexanedione	496277	784099	590853	605757	792887	530280	504246	516585
1-Hydroxyanthraquinone	150567	730008	443772	4.11059e+06	755150	2.99672e+06	3.42739e+06	3.94617e+06
1-Indanol	413420	220185	208049	145442	128011	233984		166907
1-Methylhydantoin	410413	217104	224105	155862	151494	185536	127986
1-Monopalmitin	81970	83305.2	86530.9	72966.7	185115	44544.8	54181.9	56150.3
2,2-Dimethylsuccinic Acid	1.43263e+06		341578	354893	180757	1.59702e+06	769513	1.31952e+06
2,3-Dihydroxypyridine	184408	108252	136570	150131	135365	127122		146612
2,3-Dimethylsuccinic acid	20071.3		20111.1	19694.9	18707.2	24904.8
2,6-Diaminopimelic acid			9.52731e+06	1.21723e+07		7.97548e+06	5.42351e+06
21-hydroxypregnenolone	454582	97366.8	363717	209429	206966	311514	816824	182432
2-Amino-2-norbornanecarboxylic acid	124544
2'-deoxyguanosine	45726.6	117844	97092.8	666731	179217	548209	615506	638281
2-Deoxytetronic acid	82588.6	149842	132986		327181	97438	102624	152453
2-hydroxypyridine	5.59508e+06				1.48511e+06
2-ketoadipate	22013.2	33028.1	47555.7	64521.1	35583.8	58354.4	56760.6	86678.2
2-ketobutyric acid	42854.1
2-keto-isovaleric acid	242626	844879	588873	705829	1.1833e+06
2-methylfumarate	38761.9		33902.5	28637.5	30974.6			57968.4
2-Methylglutaric Acid		47743.9	29390.1		191196
2-Monopalmitin				1.97883e+06
3-(2-Hydroxyphenyl)propionic acid	128448	278280	184510	1.25715e+06		1.12875e+06	1.06096e+06	1.56802e+06
3,6-Anhydro-D-galactose								53129.4
3,7,12-Trihydroxycoprostane	337080	505852	464796	373971	878186	551033	247117	335514
3-Aminoisobutyric acid	414205	893040	752551	725981	907419	749880	667043	244155
3-hydroxy-3-methylglutaric acid	75764.8		76461.2	85236.5		69992.2	67475.4	72275.7
3-hydroxybutyric acid	2.05721e+06	8.08464e+06	6.43356e+06	4.54936e+06	1.08592e+07	3.53748e+06	1.79639e+06	2.71883e+06
3-Hydroxynorvaline	394749	587670	439770	493101	872221	583310	954911	90493.5
3-Hydroxypropionic acid	262081	590712	775370	917652	824603	1.71145e+06	1.94489e+06
3-phosphoglycerate	125206					150231	204044	115690
4-Acetylbutyric acid	70030.4
4-Androsten-11beta-ol-3,17-dione	37441
4-hydroxybenzaldehyde	203647	297086	345251	289369	485992	262281	230550
4-Hydroxybenzoic acid	172041				106194	230750		144583
4-hydroxybutyrate	378301	145675	131822	98070.1	110704	633801	547156	619437
4-Hydroxycyclohexanecarboxylic acid	207382	233428	295871	165181	167970	305056	142806	189406
4-HYDROXYPYRIDINE	410288	490689	449460	577739	598181	572377		456005
5,6-dihydrouracil	18907.1		60367.9	43385.8	36440.7	61459.4	35634.1
5-Hydroxyindole-3-acetic acid	490282			179529	142198			674115
5-Methoxytryptamine	1.68212e+06	4.9674e+06	4.26023e+06	5.51849e+06	5.28675e+06	3.66523e+06	2.02132e+06	1.58489e+06
6-phosphogluconic acid	1.19754e+06	702963	628478	482214	1.92623e+06	648850	650209	701562
Abietic Acid	497350	807819	675643	629981	1.13979e+06	742472	745589	1.01698e+06
alanine		2.60459e+07	1.21072e+07	1.45375e+07	4.72012e+06
Aldosterone	32740.8	147055	119501	1.04771e+06	195709	622059	660276	806270
allose	1.68211e+06	652832	2.29256e+06	2.02374e+06	2.82522e+06	423948	263517	317986
alpha-D-glucosamine-phosphate	349345	126472	93518		528006	291687	410483	465615
alpha-ketoglutaric acid	649751	1.04176e+06	962803	1.206e+06	1.50674e+06	1.35268e+06		1.9414e+06
alpha-ketoisocaproic acid	58714.9	50566.8	60264.2	63778.8	47316.5	114862	80712.1	118686
alpha-Santonin	99910.1	359618	257383	186200	610826	32858.4
Aminomalonic acid	1.23179e+06	2.00095e+06	1.90398e+06	1.90753e+06	1.58564e+06	3.0265e+06		2.10039e+06
androsterone	3.03141e+06	3.32671e+06	3.68615e+06	2.63974e+06	4.8076e+06	5.1992e+06	4.51153e+06	5.41073e+06
Arachidic acid	426217	272686	250872	246911	368486	169531	183217	222792
arachidonic acid	1.33508e+06	2.44908e+06	2.26489e+06	1.98266e+06	3.08574e+06	2.94901e+06	2.50479e+06	2.86059e+06
asparagine	96126.5		40075.5		26692.5	344664
aspartic acid	2.99807e+06	3.4855e+06	1.51533e+06	1.28632e+06	1.13351e+06	1.23603e+07	9.69051e+06	755261
Atrazine-2-hydroxy	318614		649063			466992	404158	215497
Behenic acid	23735.1	3073.93	4275.01	2687.99	6651.19	3020.16	4727.72	4053.02
beta-Alanine	155575	211965	175513	188390	111337	345993	409198	285958
beta-Hydroxymyristic acid	261665	464080	294342	301806	200579	480907	390732	286239
beta-Mannosylglycerate	2.0575e+06	1.78585e+07	1.53468e+07	1.85999e+07	1.03663e+06	3.36506e+06	5.37774e+06	3.97725e+06
caffeic acid	117551	66094.3	189287	154854	126454	51450.9	43341.5	90949.9
canavanine	8468.93		3122.02		16804
Capric Acid	389985		60680.3
Carbobenzyloxy-L-leucine degr2	65991.5	204287	154049	104520	106907	205740	114297
cis-gondoic acid	46308.9	65249.2	53404.4	40095.6	105980	44386	29493.3	53167.3
Citraconic acid		42275.4	52124.8	47143.1	39934.6	59829.3	58345.2	15107.2
citric acid	1.69949e+07	1.87827e+07	1.83526e+07	2.2254e+07	1.45601e+07	1.51382e+07	1.38845e+07	1.6253e+07
citrulline		183372	117328	106022		348479	212294
conduritol b epoxide		567688	384579	414478	425303
creatine	3.13532e+06	1.78869e+07	1.58882e+07	9.99016e+06	1.18904e+07	7.66328e+06	5.15682e+06	1.51194e+06
Cyclic AMP	903524	896198	806603	739373	1.68508e+06	579732	874742	456348
cyclohexylsulfamic acid	409493	535554	450229	442231	815250	315870	349241	217568
D-(glycerol-phosphate)	4.68763e+06	6.15016e+06	5.19625e+06	5.08335e+06	7.18168e+06	6.19159e+06	4.74794e+06	4.94096e+06
D-Arabitol	2.43956e+06	2.18508e+06	2.87046e+06	3.04198e+06	7.19806e+06	1.36645e+06
Dehydroshikimic acid			26397.3
D-erythronolactone	37001.9	59254.3	37813.2	44711.2			49171.7	1701.59
D-erythro-sphingosine	32032.9			32011.4	69029.3
D-galacturonic acid	436975	121675	773888		468733		202509
d-Glucoheptose	1.24422e+06	467703	1.09186e+06	943137	2.66207e+06	145929	132856	135428
D-Glyceric acid	1.68089e+06		778957	580711	753619	4.32149e+06	6.29808e+06	5.75829e+06
dibenzofuran	126140
Dihydroxyacetone	765384	179128	174814	121537	112357	79096.5	44337.9	144402
DL-Anabasine	22983.5		32068.7	30927.8	36099.6	30066.3	24550.4
Erythrose	1.81842e+06	3.59847e+06	2.44414e+06	2.85592e+06	2.17656e+06	3.22893e+06	4.07262e+06	44096.3
Ethanolamine		3.09576e+06	2.72564e+06			1.0282e+07	8.03891e+06
Fructose 1,6-biphosphate degr prod	2.19598e+06	2.64766e+06	1.58876e+06	1.5516e+06	2.43745e+06	2.06756e+06	1.61674e+06	1.4067e+06
fructose-6-phosphate	444719	345976	122512	179554	216703	141132	206194	119837
fucose
fumaric acid	1.51214e+06	1.57946e+06	1.59822e+06	2.19398e+06	1.10032e+06	3.13099e+06	1.99179e+06	2.36374e+06
Galactinol	42548.6				123931	28288.4	29441.2	48233
Galactonic acid	302612	147680	124085	129444		197417
galactose	129957	132790	100836	146646
Glucoheptonic acid	115288		489323	429448	1.09536e+06		77109.4	93715.4
gluconic acid	461453	335435	288812	390051	2.12627e+06	17470.2
Glucose-1-phosphate	2.29089e+06		1.46355e+06	1.28232e+06	2.17304e+07	358971		153480
glucose-6-phosphate	751532	479368	257173	288482		173357	236179	143724
glucuronic acid	7.62444e+06	1.23415e+07	6.79243e+06	6.60426e+06	1.70521e+06	1.80412e+07	1.67082e+07	639205
glutamic acid	1.09121e+06	1.25207e+06	644045	698930	765885	3.47011e+06	1.96356e+06
Glutaric Acid	26971.5
glycerol	1.02071e+07	1.07869e+07	1.02537e+07			9.68151e+06	9.62969e+06	1.36757e+07
glycine	25956965	2.95401e+07	2.82005e+07	2.86373e+07	2.11712e+07	4.41696e+07	4.85165e+07	5.57266e+06
glycolic acid			2.02433e+07
heptadecanoic acid	351188	580933	444225	397667	911150	539256	321740	482964
Hesperitin	61668	264556	216304	1.80652e+06	349829	1.15777e+06	1.26907e+06	1.50834e+06
hydrocinnamic acid	81754.9	96414.7	50054.3	40679.1	74788.1		35305.6
hydroxylamine		2.9245e+06	5.99939e+06	4.33137e+06	3.06506e+07	8.94444e+06	9.51667e+06	4.82897e+07
hydroxyurea	46229.8	77761.4	69041.8	72758.4
Indolelactate	792852	277337	255774	373893	806562	469495	498018	530894
IS	27990850	37094105	34693478	36624375	45570881	38430270	39399798	7139866
Isoleucine		9.64111e+06	6.65177e+06	4.50248e+06	1.15549e+07	2.05509e+07
Itaconic acid	64524.2		47483	44332.5
kyotorphin	38523.6	49994.8	24795.6		61682	31104	87157.7	61690.1
lactic acid	6.12412e+06	1.05743e+07	9304908	6706056	8.03367e+06	1.25267e+07	1.26484e+07	13274357
Lactobionic Acid	101161	76403.7	43265.6	26405.4	287996	49354.8	44481.3	86056.1
lactose	57701.8	30939				52660.9	68306.4	48691.2
L-Allothreonine	6.93227e+06	6.6844e+06	5.8342e+06	4.98147e+06	6.24266e+06	12124930	1.46735e+07	4.95563e+06
lauric acid	1.27427e+06		617965
L-cysteine	258970	981953	449364	649430	441111	454084	393479
L-dopa	25695.6
Leucrose	679597	200316		667430	2.14488e+06	41286.3	17083.5	17584.5
Lignoceric acid	10587.6	27223.8	27466.1	26024.2	14929.8			0
linoleic acid	3.80889e+06	4.14161e+06	3.85357e+06	3.58531e+06	6.41798e+06	4.50241e+06	3.50186e+06	4.10846e+06
Linoleic acid methyl ester		228232
linolenic acid	148283	120130	150079	120506	279049	96243.8	84182.5	100972
L-Malic acid	1.51846e+06	2.11031e+06	2.5371e+06	3.96691e+06	1.46856e+06	3.09375e+06	3.81665e+06	2.28067e+06
L-Threose	175179		428851	238801	99522.7	10821.6		53478
Maleamate	29604.2	60621.2	50694	59905
maleic acid	1.3824e+07			2.65623e+07		2.49578e+07	2.55969e+07	2.85178e+07
MALONAMIDE	57996.3	59325.2	72187.8	73295.3	92579.7	64113.8	70526.8
malonic acid	305513	328983	311145	296286	324325	517886	357555	186538
mannose		5.72816e+06		5.44418e+06
Melezitose	405580	1.00994e+06	1.35203e+06	980485	3.59134e+06		431328
melibiose	97534.4	27274.7	87863.7	95974.4	145059
methionine	2.79671e+06	6.18844e+06	3.50183e+06	2.77697e+06	4.33721e+06	8.45214e+06	1.24633e+07	743406
Methyl Phosphate	867601	811253	681268	521315	1.03878e+06	766660	553519	734137
Methylmalonic acid	926653							713307
Monoolein	1.10978e+06	1.42597e+06		1.28511e+06		167215
Monostearin		31019	41109.4	31772.8				34717.8
mucic acid	21986.3						18808.1	37725
myo-inositol	1.09277e+06	1.20692e+06		887347	867586	1.49456e+06	1.37207e+06	1.20389e+06
N-(2-hydroxyethyl)-iminodiacetic acid	115606
N-Acetyl-beta-D-mannosamine	533833			534643	614231	950008	1.22267e+06	763889
N-Acetyl-D-galactosamine	403033	1.87528e+06	1.06499e+06	7.85627e+06	1.24972e+06	6.04821e+06	6.58939e+06	7.82812e+06
N-Acetyl-L-leucine	67628.6	87698.4		49373.7
Neohesperidin	27176.6	19208.1	37652.3	35092.4
N-Ethylglycine	59091.3	140406	115193	104951	139174	119040		61665.8
N-ethylmaleamic acid	10786.2	18740.2	25374.1	28917.3		31147.5	28494.8
nicotinic acid	40983.2			62706		244615	92600.6
N-Methyl-DL-alanine	359991	1.14417e+06	535956	753387	152936	872448	499336
N-Methyl-L-glutamic acid	183143	283554	284465	345609	337305	221612		208931
noradrenaline	587095	335486	244372	537154	2.99073e+06	90377.5	90462.6	97586.9
Norleucine	99238.9	57974.9	77390		116915	181122	167524
O-acetylserine	193432			166156	140137	603123	1.11906e+06
Octadecanol		14325.4	9687.12	9424.77		8609.95	10285.9	13997.4
oleic acid		1.06581e+06		789722
O-Phosphorylethanolamine	261586		318346			53764.7	67972.1
ornithine	1.08849e+07	7.82375e+06	4.57205e+06	7.54392e+06	4.58927e+06		4.68441e+07	0
oxalacetic acid	3.18137e+06	1.21972e+07	1.34719e+07	2.49203e+07	8.91543e+06	22743057	2.2411e+07
oxalic acid		1.56998e+06	1.76675e+06	2.38382e+06	3.5533e+06	1.97514e+06	2.1186e+06	1.94568e+06
oxoproline	7.85911e+06			1.17075e+07	1.23268e+07	1.57158e+07		6.40079e+06
palatinitol	64343.8	6731.37	46213.6	34491.6	59110.7	4149.71
Palatinose	77155.6	18773.8	62300.7	74905.5	103573	11308.5
palmitic acid	3.4751e+07		3.13227e+07	2.84075e+07	4.66785e+07	3.23811e+07	2.85929e+07	31493520
palmitoleic acid	44543.2	46958.3		50943.7
palmitoleic acid	1.57687e+06	866013	1.02126e+06	465531	2.11902e+06	422514	332508	460261
pantothenic acid	45307.3	64560.4	46396.1	57392	116100	37307.8	48367.6	51270.9
p-cresol	430150		687244	732265	1.28999e+06	772650	744050	1.10052e+06
Pelargonic acid	528867	104708	96451	88235.4	80640.7	81727.8	78986.1	98605.3
Phenyl beta-D-glucopyranoside	26641.1	55653.6	33109.1	21735.6		39339.8	21475.1	17090.6
phenylalanine	4.09372e+06	4.18186e+06	3.29057e+06	3.37061e+06	3.87392e+06	7.61344e+06	1.33281e+07
phenylalanine	796985	1.28113e+06	1.77252e+06	1.88818e+06		2.43509e+06	2.32796e+06	1.25652e+07
Phenylphosphoric acid	1.67529e+06	3.85022e+06	2.83748e+06	2.73017e+06	3.07247e+06	3.11945e+06	2.56676e+06	3.00563e+06
phloretin	128330	540537	423272	4.0449e+06	702598	2.3436e+06	3.21086e+06	3.19076e+06
phosphate	5.68391e+07		1.63157e+07	2.0064e+07	3.12574e+07		4.08667e+07	4.96085e+07
phthalic acid	571373		617679
phytosphingosine	84489.3	63323.9			132408	122504
piceatannol	102697	390653	334268	2.87369e+06	571159	1.81608e+06	2.02652e+06	2.24777e+06
proline	1.41779e+07	6.17447e+06	2.46066e+06	2.20751e+06	3.29198e+06	2.3978e+07	3.4655e+07
prostaglandin A2	464973	70274.6	321133	210330	632931	58569.3
Purine riboside	8603.4					3524.57
pyrogallol	32595.3		71552.9	53507		72567.7	63301
Pyrrole-2-Carboxylic Acid	23384.7					25745.9
Ribonic acid, gamma-lactone	115470		115516	134896	306566
ribose	1.22617e+06	4.28711e+06		3.56861e+06	6.60146e+06
salicylic acid	31101.1
sarcosine	1.52731e+06	2.93398e+06	3.73651e+06	2.4602e+06	3.34776e+06	4.39671e+06	3.45988e+06	1.09469e+06
serine		59558.6		1585.65	58242.6		58137.8
Sinapyl alcohol	69067.7	51247.5	31209.4	21335.3		36490		134590
Sophorose	2.62765e+06	758659	3.84842e+06	2.55168e+06	8.81228e+06	146771	4584.17	51904.9
sorbitol	94541276	105560810	6.398e+07		2.259e+07
stearic acid	1.72824e+07	1.91774e+07	1.62712e+07	1.58682e+07	2.40033e+07	1.72012e+07	15785483	1.70351e+07
succinic acid	1.35143e+06	2.12363e+06	1.5921e+06	2.10063e+06	1.6322e+06	2.38583e+06	2.82855e+06	2.55756e+06
sucrose	573595	75792.5	109305	96947.4	114992	351407	308380	576903
tartaric acid	1.21648e+06	4.81917e+06	3.41551e+06	1.40869e+07	4.37699e+06	11875046	1.1113e+07	1.44182e+07
Tartronic acid	56053.6	44843.7	42788.5	35732.5	44201.4	59669.8	41948	32385.6
taurine	1.9492e+06	2.40769e+06	990795	1.35755e+06	1.3042e+06	835863	380091
Tetrahydrocorticosterone	84724.3	54278.3	56137.1	37062.5	125608	50891.7	75912.5	42858.2
Thioctamide	524529	4.45667e+06	1.91247e+06	1.34384e+07	3.61114e+06	1.09654e+07	2.01268e+07	2.30127e+07
Threitol	588185	546390	575272	458365	648118	712782	653570	847998
threo-beta-hydroxyaspartate	55540.2	432093	185567	105957	73906.1	253675	123602	95570.1
Threonic acid	516699	1.32144e+06	1.67075e+06	1.23112e+06	1.18981e+06	672758	768393	1.071e+06
thymine	50457.1	34238.9	48107.4	45480.9	15305.1	81605.8	108337	79663.6
Thymol	37829.8	58850.1	54366.2	52947.6	56405.3		57710.9	15014.8
trans-4-hydroxy-L-proline	155003	261316	283751	438677		314129	148500	3.57
trehalose	72064.9	217051	193439	145504	243563	203393	167823	123193
tryptophan					82396.4
tyrosine	960282	1.00722e+06	724922	740791	355126	994042	2.31665e+06	94454.4
uracil	1.26845e+06	919019	737796	758216	686995	2.04153e+06	1.66568e+06	2.03481e+06
uric acid		1.52751e+06	1.48676e+06	1.60767e+06	2.5814e+06	2.40622e+06	2.50462e+06
uridine			390277	314624	1.08411e+06	39086.4
valine	2.32617e+07	1.67249e+07	1.27711e+07	1.33282e+07	2.45886e+07	3.10127e+07	3.0265e+07
xanthine	27785.8	78748.3	50188.6	58900.3	38421.1	56234.3	56991.4	57311.1
xanthosine	66682.2	183683	134497	932529	235525	792878	888106	892979
xanthotoxin	98495.3		56343.7
xylose		70573.7	54994.8			72838.1	52607.3
