# Supplementary material for: Pathogenic mycobacteria suppress host antimicrobial peptides by dehydrogenating L-alanine
Source: Research Square preprint supplement (doi:10.21203/rs.3.rs-3367542/v1), 2023-09-22
Supplement: Supplementary file 4 [file cf64e7c01b6d886de1f2f2ca.xlsx]

## Sheet: protein_annotations
Supplementary Table 1. List of plasmids encoding 201 Mtb secretory proteins.
Identifier	Other name	DEFB4 mRNA(log2)	Protein annotations
MT0066.1	MT0066.1	0.728128	Secreted protein
Rv0016c	pbpA	-0.649039	Probable penicillin-binding protein pbpa; Cell wall formation. Plays an important role in cell division and cell shape maintenance by cross-linking adjacent peptidoglycan chains through transpeptidation
Rv0040c	mtc28	-1.11937	Secreted proline rich protein mtc28 (proline rich 28 kda antigen); To M.leprae ML0031
Rv0056	rplI	-1.94304	50S ribosomal protein L9 RplI; Binds to the 23S rRNA.
Rv0079	Rv0079	1.84313	Unknown protein; Involved in translation regulation Inhibits protein synthesis and decreases bacterial growth when expressed in E.coli . Can also stimulate macrophages and peripheral blood mononuclear cells (PBMC) to secrete important cytokines that may be significant in granuloma formation and its maintenance. Increases secretion of IFN-gamma, TNF-alpha, IL-1 beta and IL-8 through human Toll-lik…
Rv0116c	ldtA	0.104294	Probable l,d-transpeptidase ldta; Generates 3->3 cross-links in peptidoglycan, catalyzing the cleavage of the mDap(3)-D-Ala(4) bond of a tetrapeptide donor stem and the formation of a bond between the carbonyl of mDap(3) of the donor stem and the side chain of mDap(3) of the acceptor stem. Is specific for donor substrates containing a stem tetrapeptide since it cannot use pentapeptide stems. Is t…
Rv0129c	fbpC	-1.2577	Diacylglycerol acyltransferase/mycolyltransferase ag85c; The antigen 85 proteins (FbpA, FbpB, FbpC) are responsible for the high affinity of mycobacteria to fibronectin, a large adhesive glycoprotein, which facilitates the attachment of M.tuberculosis to murine alveolar macrophages (AMs). They also help to maintain the integrity of the cell wall by catalyzing the transfer of mycolic acids to cell…
Rv0152c	PE2	0.407294	Rv0152c, (MTCI5.26c), len: 525 aa. PE2, Member of the Mycobacterium tuberculosis PE family (see citation below), similar to ORF downstream Z92770|MTCI5_25 (588 aa),FASTA scores: opt: 1492, E(): 0, (54.7% identity in 464 aa overlap); and to many other PE family type members. Predicted to be an outer membrane protein (See Song et al.,2008)
Rv0172	mce1D	0.0977944	Mce-family protein Mce1D; Rv0172, (MTCI28.12), len: 530 aa. Mce1D; belongs to 24-membered Mycobacterium tuberculosis Mce protein family (see citations below), highly similar to Mycobacterium tuberculosis proteins O07786|Rv0592|MTCY19H5.30c|mce2D (508 aa); O53970|Rv1969|MTV051.07|mce3D (423 aa); etc. Also highly similar to others e.g. NP_302659.1|NC_002677 putative secreted protein from Mycobacter…
Rv0173	lprK	-1.02787	Rv0173, (MTCI28.13), len: 390 aa. Possible lprK (alternate gene name: mce1E), lipoprotein which belongs to 24-membered Mycobacterium tuberculosis Mce protein family (see citations below), highly similar to Mycobacterium tuberculosis proteins O07785|LPRL|Rv0593|MTCY19H5.29|mce2E (402 aa); O53971|LPRM|Rv1970|MTV051.08|mce3E (377 aa); etc. Also highly similar to others e.g. NP_302660.1|NC_002677 put…
Rv0195	Rv0195	-0.271205	Possible two component transcriptional regulatory protein (probably luxr-family); Rv0195, (MTV033.03), len: 211 aa. Possible two-component response regulator, luxR family, similar to many e.g. U00008|ECOHU49_15 regulatory protein narP from Escherichia coli strain K12 (225 aa), FASTA scores: opt: 232, E(): 7.3e-09, (29.2% identity in 219 aa overlap). Start chosen by similarity. Contains probable h…
Rv0222	echA1	0.765127	Probable enoyl-coa hydratase echa1 (enoyl hydrase) (unsaturated acyl-coa hydratase) (crotonase); Belongs to the enoyl-CoA hydratase/isomerase family
Rv0247c	Rv0247c	-1.22937	Probable succinate dehydrogenase [iron-sulfur subunit] (succinic dehydrogenase); Rv0247c, (MTV034.13c), len: 248 aa. Probable succinate dehydrogenase, iron-sulfur subunit, highly similar to CAC44313.1|AL596043 putative succinate dehydrogenase iron-sulfur subunit from Streptomyces coelicolor (259 aa); and similar to iron-sulphur protein subunits of fumarate reductase or succinate dehydrogenases fr…
Rv0285	PE5	-0.346706	Pe family protein pe5; Important for the siderophore-mediated iron-acquisition function of ESX-3 . May play a pivotal role in the evasion of host immune response by M.tuberculosis. Mediates production of IL-10 via activation of the p38 and ERK1/2 mitogen-activated protein kinase (MAPK) signaling pathways
Rv0288	esxH	-0.247039	Low molecular weight protein antigen 7 esxh (10 kda antigen) (cfp-7) (protein tb10.4); EsxH, in complex with EsxG, disrupts ESCRT function and impairs host phagosome maturation, thereby promoting intracellular bacterial growth. The complex acts by interacting, via EsxH, with the host hepatocyte growth factor-regulated tyrosine kinase substrate (HGS/HRS), a component of the ESCRT machinery
Rv0291	mycP3	0.119961	Mycosin-3; Belongs to the peptidase S8 family
Rv0309	Rv0309	-0.0750387	Rv0309, (MTCY63.14), len: 218 aa. Possible conserved exported protein (has putative N-terminal signal sequence),equivalent to AC32053.1|AL583926 putative secreted protein from Mycobacterium leprae (218 aa). Also similar to others e.g. AB76092.1|AL157956 putative secreted protein from Streptomyces coelicolor (238 aa). Predicted to be an outer membrane protein (See Song et al., 2008)
Rv0335c	PE6	0.309794	Rv0335c, (MTCY279.02c), len: 171 aa. PE6, Member of the Mycobacterium tuberculosis PE family (see Brennan & Delogu 2002); contains short region of similarity to part of the unique N-terminus of the Mycobacterium tuberculosis PGRS family of Glycine-rich proteins e.g. Y03A_MYCTU|Q10637 hypothetical glycine-rich 49.6 kd protein (603 aa), FASTA scores: opt: 219, E(): 1.1e-08, (51.5% identity in 66 aa…
Rv0344c	lpqJ	-0.340206	Probable lipoprotein LpqJ; Rv0344c, (MTCY13E10.04c), len: 186 aa. Probable lipoprotein, without homology. Has an appropriately positioned prokaryotic lipoprotein signature (PS00013)
Rv0398c	Rv0398c	-0.401205	Possible secreted protein; Rv0398c, (MTCY04D9.10c), len: 213 aa. Possible secreted protein, sharing no homology with other proteins. Has potential signal sequence with hydrophobic stretch from aa 7-25
Rv0399c	lpqK	0.570961	Rv0399c, (MTCY04D9.11c), len: 409 aa. Possible lpqK,conserved lipoprotein, showing some similarity to penicillin binding proteins and various peptidases e.g. DAC_STRSQ|P15555 d-alanyl-d-alanine carboxypeptidase protein (406 aa), FASTA scores: opt: 348, E(): 5.6e-16,(29.2% identity in 301 aa overlap). Also similar to other Mycobacterium tuberculosis PBPs and esterases. Has possible N-terminal sign…
Rv0403c	mmpS1	1.02696	Rv0403c, (MTCY04D9.16c), len: 142 aa. Probable mmpS1, conserved membrane protein (see citation below),highly similar to other Mycobacterial proteins e.g. YV33_MYCLE|P54880 hypothetical 16.9 kDa protein from Mycobacterium leprae (154 aa), FASTA scores: opt: 458, E(): 1.6e-26, (46.9% identity in 143 aa overlap); YV33_MYCTU|Q11170 hypothetical 15.9 kDa protein from Mycobacterium tuberculosis (147 aa…
Rv0410c	pknG	-0.72754	Serine/threonine-protein kinase pkng (protein kinase g) (stpk g); Phosphorylates GarA. May play a role in metabolic regulation via control of the phosphorylation status of GarA. Plays a crucial role in the survival of mycobacteria within host macrophages, by blocking the intracellular degradation of mycobacteria in lysosomes. Required for intrinsic antibiotic resistance
Rv0411c	glnH	0.152628	Rv0411c, (MTCY22G10.07c), len: 328 aa. Probable glnH, glutamine-binding protein, membrane-bound lipoprotein (see citation below), equivalent to AL035159|MLCB1450_15|T44736|4154051|CAA22704.1 glutamine-binding protein homolog from Mycobacterium leprae (325 aa), FASTA scores: opt: 1747, E(): 0, (79.3% identity in 328 aa overlap). Also similar to others e.g. GLNH_BACST|P27676 glutamine-binding prote…
Rv0418	lpqL	1.18513	Probable lipoprotein aminopeptidase lpql; An aminopeptidase; acts on free N-terminal amino groups with a very strong preference for Leu in the first position
Rv0426c	Rv0426c	0.384795	Possible transmembrane protein; Rv0426c, (MTCY22G10.23c), len: 147 aa. Possible transmembrane protein; has potential transmembrane domains aa 19-41, and aa 61-83
Rv0455c	Rv0455c	-0.685539	Conserved protein; Rv0455c, (MTV037.19c), len: 148 aa. Conserved protein, equivalent to CAC31896.1|AL583925 possible secreted protein from Mycobacterium leprae (153 aa). Has hydrophobic stretch at N-terminus. A core mycobacterial gene; conserved in mycobacterial strains (See Marmiesse et al., 2004). Predicted to be an outer membrane protein (See Song et al., 2008)
Rv0477	Rv0477	0.87846	Possible conserved secreted protein; To M.leprae ML2452
Rv0550c	vapB3	-0.605372	Possible antitoxin vapb3; Antitoxin component of a type II toxin-antitoxin (TA) system. Upon expression in M.smegmatis neutralizes the effect of cognate toxin VapC3
Rv0559c	Rv0559c	-0.440039	Uncharacterized protein Rv0559c; Rv0559c, (MTCY25D10.38c), len: 112 aa. Possible conserved secreted protein, similar to NP_302481.1|NC_002677 putative secreted protein from Mycobacterium leprae (112 aa). Also similar to Y08B_MYCTU|Q11048 hypothetical 11.6 kDa protein FASTA scores: opt: 111, E(): 011, (25.4% identity in 114 aa overlap). Contains possible N-terminal signal sequence. A core mycobact…
Rv0569	Rv0569	0.373627	Rv0569, (MTV039.07), len: 88 aa. Conserved protein. C-terminus highly similar to AAA63065.1|U15184|MLU15184_10 hypothetical protein from Mycobacterium leprae (53 aa),FASTA scores: opt: 140, E(): 0.0046, (64.7% identity in 34 aa overlap). Also similar to T36824|SCI35.11 hypothetical protein from Streptomyces coelicolor (64 aa); and N-terminus of T36956 probable DNA-binding protein from Streptomyce…
Rv0592	mce2D	0.929794	Mce-family protein Mce2D; Rv0592, (MTCY19H5.30c), len: 508 aa. Mce2D; belongs to 24-membered Mycobacterium tuberculosis Mce protein family (see citations below), highly similar to Mycobacterium tuberculosis proteins O07416|Rv0172|MTCI28.12|mce1D (530 aa); O53970|Rv1969|MTV051.07|mce3D (423 aa); etc. Also highly similar to others e.g. NP_302659.1|NC_002677 putative secreted protein from Mycobacter…
Rv0598c	vapC27	-0.222705	Possible toxin vapc27. contains pin domain.; Probably the toxic component of a type II toxin-antitoxin (TA) system. An RNase (By similarity). Its cognate antitoxin is VapB27
Rv0640	rplK	-1.84787	50S ribosomal protein L11 RplK; Forms part of the ribosomal stalk which helps the ribosome interact with GTP-bound translation factors
Rv0671	lpqP	0.624627	Rv0671, (MTCI376.03c), len: 280 aa. Possible lpqP,conserved lipoprotein, similar to U00012|B1308_F2_43|Q49658 from Mycobacterium leprae (302 aa), FASTA scores: opt: 449,E(): 2.4e-22, (37.6% identity in 242 aa overlap). Also highly similar to lpqC|Rv3298c|MTCY71.38c putative lipoprotein from Mycobacterium tuberculosis (304 aa). Also similar to a large variety of proteins including various esterase…
Rv0680c	Rv0680c	-0.949539	Probable conserved transmembrane protein; Rv0680c, (MTV040.08c), len: 124 aa. Possible conserved transmembrane protein, showing similarity with C-terminal part of Rv0314c|Z96800|MTCY63.19c conserved hypothetical protein from Mycobacterium tuberculosis (220 aa), FASTA scores: opt: 175, E(): 2.2e-05, (31.4% identity in 102 aa overlap). Also some similarity to upstream ORF Rv0679c|MTV040.07c conserv…
Rv0700	rpsJ	-0.543372	30S ribosomal protein S10 RpsJ (transcription antitermination factor NusE); Involved in the binding of tRNA to the ribosomes
Rv0710	rpsQ	0.300461	30S ribosomal protein S17 RpsQ; One of the primary rRNA binding proteins, it binds specifically to the 5'-end of 16S ribosomal RNA
Rv0732	secY	1.52263	Probable preprotein translocase secy; The central subunit of the protein translocation channel SecYEG. Consists of two halves formed by TMs 1-5 and 6-10. These two domains form a lateral gate at the front which open onto the bilayer between TMs 2 and 7, and are clamped together by SecE at the back. The channel is closed by both a pore ring composed of hydrophobic SecY resides and a short helix (h…
Rv0817c	Rv0817c	1.12296	Rv0817c, (MTV043.09c), len: 270 aa. Probable conserved exported protein, with N-terminal signal sequence, equivalent (but shorter 13 aa) to U15182|MLU15182_22|U2266M probable exported protein from Mycobacterium leprae (283 aa), FASTA scores: opt: 1287,E(): 0, (73.0% identity in 270 aa overlap). A core mycobacterial gene; conserved in mycobacterial strains (See Marmiesse et al., 2004). Predicted t…
Rv0832	PE_PGRS12	1.00913	PE-PGRS family protein PE_PGRS12; Rv0832, (MTV043.24), len: 137 aa. PE_PGRS12, Member of the Mycobacterium tuberculosis PE family, possibly PGRS subfamily of gly-rich proteins (see citation below), highly similar to many others e.g. MTCY1A11.25c|Z78020 (498 aa),FASTA scores: opt: 529, E(): 5.2e-22, (61.8% identity in 136 aa overlap); etc. Appears to have incurred frameshift as next ORF should be …
Rv0838	lpqR	-1.40471	Probable conserved lipoprotein lpqr; Catalyzes hydrolysis of the D-alanyl-D-alanine dipeptide
Rv0865	mog	0.416128	Rv0865, (MTV043.58), len: 160 aa. Probable mog,molybdopterin biosynthesis MOG protein, highly similar or similar to other molybdenum cofactor biosynthesis proteins e.g. CAB59675.1|AL132674 molybdenum cofactor biosynthesis protein from Streptomyces coelicolor (179 aa); NP_301253.1|NC_002677 putative molybdenum cofactor biosynthesis protein from Mycobacterium leprae (181 aa); CAC39235.1|AJ312124 Mo…
Rv0888	spmT	1.67346	Probable exported protein; Catalyzes the cleavage of sphingomyelin, a major lipid in eukaryotic cells, into ceramide and phosphocholine, which are then utilized by M.tuberculosis as carbon, nitrogen and phosphorus sources, respectively. Thus, enables M.tuberculosis to utilize sphingomyelin as a source of several essential nutrients for intracellular growth during infection. Furthermore, lyses ery…
Rv0934	pstS1	-0.194373	Periplasmic phosphate-binding lipoprotein psts1 (pbp-1) (psts1); Functions in inorganic phosphate uptake, although probably not the main uptake protein under phosphate starvation . Binds phosphate; probably able to bind both H(2)PO(4)(-) and HPO(4)(2-) Part of the ABC transporter complex PstSACB involved in phosphate import (Probable)
Rv0999	Rv0999	-1.97121	Uncharacterized protein; Rv0999, (MTCI237.13), len: 252 aa. Unknown protein. Predicted to be an outer membrane protein (See Song et al.,2008)
Rv1016c	lpqT	0.440294	Putative lipoprotein LpqT; Rv1016c, (MTCY10G2.33), len: 226 aa. Probable lpqT,conserved lipoprotein. Similar to several Mycobacterium tuberculosis hypothetical proteins e.g. Rv0040c|Y0H3_MYCTU|P71697 Proline rich 28 kDA antigen (310 aa), FASTA scores: opt: 329, E(): 2e-17, (32.3% identity in 229 aa overlap); Rv0583c. Contains PS00013 Prokaryotic membrane lipoprotein lipid attachment site. A core …
Rv1031	kdpC	3.30579	Potassium-transporting atpase kdpc subunit; Part of the high-affinity ATP-driven potassium transport (or Kdp) system, which catalyzes the hydrolysis of ATP coupled with the electrogenic transport of potassium into the cytoplasm. This subunit acts as a catalytic chaperone that increases the ATP-binding affinity of the ATP-hydrolyzing subunit KdpB by the formation of a transient KdpB/KdpC/ATP terna…
Rv1040c	PE8	1.09629	Pe family protein pe8; Rv1040c, (MTCY10G2.09), len: 275 aa. PE8, Member of the Mycobacterium tuberculosis PE family (see citation below), most similar to AL008967|MTV002_34 Mycobacterium tuberculosis H37Rv (275 aa), FASTA scores: opt: 1111, E(): 0, (68.6% identity in 283 aa overlap). This region is a possible MT-complex-specific genomic island (See Becq et al., 2007)
Rv1064c	lpqV	1.04896	Putative lipoprotein LpqV; Rv1064c, (MTV017.17c), len: 139 aa. Possible lipoprotein LpqV. Has N-terminal signal sequence and appropriately positioned PS00013 Prokaryotic membrane lipoprotein lipid attachment site
Rv1174c	TB8.4	-0.186538	Rv1174c, (MTV005.10c), len: 110 aa. TB8.4, low molecular weight T-cell antigen (see citations below),hypothetical unknown secreted protein. Predicted to be an outer membrane protein (See Song et al., 2008). Predicted possible vaccine candidate (See Zvi et al., 2008)
Rv1214c	PE14	0.512961	Pe family protein pe14; Rv1214c, (MTCI364.26c), len: 110 aa. PE14, Member of Mycobacterium tuberculosis PE family (see citation below),appears to be frameshifted but sequence appears to be correct. The 5'-end is atypical as first 9 aa appear to be missing
Rv1235	lpqY	-0.330706	Probable sugar-binding lipoprotein lpqy; Part of the ABC transporter complex LpqY-SugA-SugB-SugC, which is highly specific for uptake of trehalose. Involved in the recycling of extracellular trehalose released from trehalose-containing molecules synthesized by M.tuberculosis. Trehalose uptake is essential for virulence
Rv1252c	lprE	-0.0760391	Putative lipoprotein LprE; Rv1252c, (MTCY50.30), len: 202 aa. Probable lipoprotein lprE, some similarity to Mycobacterium tuberculosis protein Rv3483c|MTCY13E12.36C (220 aa), FASTA scores: E(): 7e-05, (29.5% identity in 200 aa overlap). Contains possible N-terminal signal sequence and appropriately positioned prokaryotic lipoprotein lipid attachment site (PS00013). A core mycobacterial gene; cons…
Rv1268c	Rv1268c	2.63479	Uncharacterized protein Rv1268c; Rv1268c, (MTCY50.14), len: 232 aa. Hypothetical unknown protein, probably secreted protein : contains possible signal peptide sequence (score 7.9 at residue 28). Predicted to be an outer membrane protein (See Song et al.,2008)
Rv1270c	lprA	-1.44504	Possible lipoprotein lpra; Constitutes a host TLR2 agonist (toll-like receptor), shown experimentally for human and mouse . In host cells full-length (acylated) protein acts as a TLR2 agonist, inducing human and murine macrophages to produce cytokines, inducing murine dendritic cell maturation and cytokine production and inhibiting antibody processing in murine macrophages . Binds diacylated phos…
Rv1296	thrB	0.248794	Probable homoserine kinase thrb; Catalyzes the ATP-dependent phosphorylation of L-homoserine to L-homoserine phosphate
Rv1344	mbtL	1.92496	Acyl carrier protein (acp) mbtl; Acyl carrier protein involved in the formation of acyl-S-ACP intermediates within the mycobactin biosynthesis process. The aliphatic chains carried by ACP are subsequently transferred on to the mycobactin core by MbtK
Rv1368	lprF	-1.88054	Probable conserved lipoprotein lprf; Might be involved in transporting short diacylated glycolipids to the cell outer membrane (By similarity). Overexpression induces expression of sensor protein kdpD gene at low K(+) concentrations (0 and 250 uM, tested in M.smegatis)
Rv1386	PE15	0.819794	Pe family protein pe15; May play a pivotal role in the evasion of host immune response by M.tuberculosis. Mediates production of IL-10 via activation of the p38 and ERK1/2 mitogen-activated protein kinase (MAPK) signaling pathways
Rv1401	Rv1401	-0.696539	Rv1401, (MTCY21B4.18), len: 200 aa. Possible membrane protein
Rv1411c	lprG	-1.08937	Probably helps membrane protein Rv1410c (P55) transport triacylglycerides (TAG) across the inner cell membrane into the periplasm; TAG probably regulates lipid metabolism and growth regulation . Binds TAG and transfers it between lipid bilayers, probably to the outer membrane in vivo . Binds di- and triacylated phosphatidyl-myo-inositol mannosides (PIMs), and glycolipid lipoglycan modulins lipoar…
Rv1418	lprH	-0.973872	Putative lipoprotein LprH; Rv1418, (MTCY21B4.36), len: 228 aa. Probable lprH,lipoprotein. Contains N-terminal signal sequence and appropriately positioned prokaryotic lipoprotein lipid attachment site (PS00013)
Rv1419	Rv1419	1.27446	Rv1419, (MTCY21B4.37), len: 157 aa. Unknown protein. Predicted to be an outer membrane protein (See Song et al.,2008)
Rv1426c	lipO	0.486294	Probable esterase LipO; Rv1426c, (MTCY493.28), len: 420 aa. Possible lipO,esterase, similar to several Mycobacterium tuberculosis hypothetical lipases and esterases e.g. Rv1399c, Rv2284,etc. Also similar in central region to AAAD_HUMAN|P22760 human arylacetamide deacetylase (398 aa), FASTA scores: opt:210, E(): 7.6e-07, (29.3% identity in 191 aa overlap)
Rv1435c	Rv1435c	-0.604872	Probable conserved proline, glycine, valine-rich secreted protein; Rv1435c, (MTCY493.19), len: 202 aa. Probable conserved Pro-, Gly-, Val-rich secreted protein (see citation below) with a N-terminal signal sequence. Similar at C-terminus to AF017099|AF017099_1 Mycobacterium tuberculosis pGB1 (87 aa), FASTA scores: opt: 550, E(): 2.3e-17, (97.7% identity in 86 aa overlap). Shows some similarity to…
Rv1471	trxB1	-0.587872	Probable thioredoxin trxb1; Belongs to the thioredoxin family
Rv1477	ripA	-1.13171	Peptidoglycan hydrolase; Peptidoglycan endopeptidase that cleaves the bond between D- glutamate and meso-diaminopimelate. Binds and degrades high-molecular weight peptidoglycan from a number of Actinobacteria; activity is increased in the presence of RpfB and inhibited by PBP1A (ponA1). Required for normal separation of daughter cells after cell division and for cell wall integrity. Required for …
Rv1488	Rv1488	-0.000705543	Uncharacterized protein Rv1488; Rv1488, (MTCY277.09), len: 381 aa. Possible exported conserved protein; contains possible N-terminal signal sequence. Similar to YBBK_ECOLI|P77367 hypothetical protein ybbK from Escherichia coli (305 aa), FASTA scores: opt: 716, E(): 0, (37.1% identity in 307 aa overlap). Similar to stomatin-like proteins e.g. AF065260|AF065260_1 Clostridium difficile (320 aa), FAS…
Rv1528c	papA4	-0.517206	Rv1528c, (MTV045.02), len: 165 aa. Probable papA4,conserved polyketide synthase (PKS) associated protein; shows some similarity to C-terminal part of hypothetical proteins from Mycobacterium tuberculosis and Mycobacterium leprae e.g. Z97188|MTCY409_10 Mycobacterium tuberculosis cosmid (468) (37.9% identity in 66 aa overlap); or U00010_11 Mycobacterium leprae cosmid B1170 (35.7% identity in 84 aa …
Rv1541c	lprI	-1.91371	Possible lipoprotein lpri; Strongly binds and inhibits lysozyme, may help bacteria survive in lysozyme-producing host cells. When overexpressed in M.tuberculosis or M.smegmatis increases resistance to hen egg white lysozyme. M.smegmatis overexpressing LprI survive better during intracellular infection of peritoneal and monocyte-derived macrophages, both of which produce lysozyme during infection;…
Rv1648	Rv1648	0.967295	Rv1648, (MTCY06H11.13), len: 268 aa. Probable transmembrane protein, some similarity to Rv3434c|MTCY77.06C (237 aa), FASTA scores: E(): 0.00039,(31.4% identity in 194 aa overlap)
Rv1732c	Rv1732c	-0.835539	Conserved protein; Rv1732c, (MTCY04C12.17c), len: 182 aa. Conserved protein, highly similar to hypothetical proteins from several organisms e.g. P73178|SLL1289|D90904 from Synechocystis (194 aa), FASTA scores: opt: 663, E(): 0,(53.1% identity in 179 aa overlap); etc
Rv1734c	Rv1734c	0.25396	Uncharacterized protein Rv1734c; Rv1734c, (MTCY04C12.19c), len: 80 aa. Conserved hypothetical protein, similar to C-terminal region Q9Z8N2|CP0452|AE001615 Dihydrolipoamide Acetyltransferase from Chlamydia pneumoniae (429 aa), FASTA scores: opt: 138,E(): 0.0012, (26.9% identity in 78 aa overlap)
Rv1738	Rv1738	-0.133205	Conserved protein; To M.tuberculosis Rv2632c
Rv1788	PE18	-1.25404	Rv1788, (MTV049.10), len: 99 aa. PE18, Member of the Mycobacterium tuberculosis PE family of gly-, ala-rich proteins (see citation below), similar to Z93777|MTCI364.07 Mycobacterium tuberculosis cosmid (99 aa), FASTA scores: opt: 414, E(): 3.6e-20, (72.4% identity in 98 aa overlap)
Rv1791	PE19	-0.593372	Pe family protein pe19; Rv1791, (MTV049.13), len: 99 aa. PE19, Member of the Mycobacterium tuberculosis PE family, but no glycine rich C-terminus (see Brennan & Delogu 2002), highly similar to Z93777|MTCI364.07 M.tuberculosis cosmid (99 aa) opt: 430 E(): 2.4e-21, (75.5% identity in 98 aa overlap)
Rv1796	mycP5	-1.40954	Mycosin-5; Belongs to the peptidase S8 family
Rv1804c	Rv1804c	-0.626039	Conserved protein; Rv1804c, (MTV049.26c), len: 108 aa. Conserved protein, similar to several hypothetical Mycobacterium tuberculosis proteins that may be exported (hydrophobic stretch at N-terminus) e.g. O07222|Rv1810|MTCY16F9.04C|Z96073 (118 aa), FASTA scores: opt: 361, E(): 2.3e-19, (53.5% identity in 101 aa overlap); Rv0622, Rv1690, and Rv3067, etc. Predicted to be an outer membrane protein (S…
Rv1857	modA	-1.60204	Probable molybdate-binding lipoprotein moda; Involved in the transport of molybdenum into the cell. Part of the binding-protein-dependent transport system ModABCD (By similarity)
Rv1884c	rpfC	-0.668206	Probable resuscitation-promoting factor rpfc; Factor that stimulates resuscitation of dormant cells. Has peptidoglycan (PG) hydrolytic activity. Active in the pM concentration range. Has little to no effect on actively-growing cells. PG fragments could either directly activate the resuscitation pathway of dormant bacteria or serve as a substrate for endogenous Rpf, resulting in low molecular weig…
Rv1891	Rv1891	-1.10154	Conserved protein; Rv1891, (MTCY180.27c), len: 135 aa. Conserved protein. Equivalent to MLCB561.09|AL049571 hypothetical protein from Mycobacterium leprae (134 aa), FASTA scores: opt: 800, E(): 0, (79.7% identity in 133 aa overlap). A core mycobacterial gene; conserved in mycobacterial strains (See Marmiesse et al., 2004)
Rv1906c	Rv1906c	-1.70904	Conserved protein; Rv1906c, (MTCY180.12), len: 156 aa. Conserved protein, possibly exported protein, equivalent to Mycobacterium leprae AJ000521|MLCOSL672.01 (153 aa), FASTA scores: opt: 637, E(): 2.6e-28, (63.2% identity in 155 aa overlap). Also similar to M. tuberculosis hypothetical exported protein, Rv1352. A core mycobacterial gene; conserved in mycobacterial strains (See Marmiesse et al.,20…
Rv1980c	mpt64	-1.96171	Immunogenic protein mpt64 (antigen mpt64/mpb64); Immunogenic protein MPT64; Rv1980c, (MT2032, MTCY39.39), len: 228 aa. Mpt64 (alternate gene name: mpb64), immunogenic protein (alternate gene name: mpb64) (see citations below),identical to MPT64|MPB64 from Mycobacterium bovis (228 aa). Similar to Rv3036c|MTV012.51c from Mycobacterium tuberculosis. Exported protein containing a N-terminal signal se…
Rv1984c	cfp21	-1.32671	Probable cutinase precursor cfp21; Belongs to the cutinase family
Rv2005c	Rv2005c	-1.02737	Universal stress protein family protein; Probably involved in aminoglycosides resistance and virulence. Overexpression increases resistance to the aminoglycosides amikacin (AK) and kanamycin (KM)
Rv2031c	hspX	-0.663872	Heat shock protein hspx (alpha-crystallin homolog) (14 kda antigen) (hsp16.3); Acts as a chaperone, as it has a significant ability to suppress the thermal denaturation of alcohol dehydrogenase. Cells overexpressing this gene grow more slowly than wild-type cells, and are less susceptible to autolysis following saturation of the culture in vitro, suggesting this protein may slow down the growth r…
Rv2041c	Rv2041c	0.219461	Rv2041c, (MTV018.28c), len: 439 aa. Probable sugar-binding lipoprotein component of sugar transport system, similar to many. Contains signal sequence and appropriately positioned PS00013 Prokaryotic membrane lipoprotein lipid attachment site
Rv2068c	blaC	-0.164872	Class a beta-lactamase blac; Extended spectrum beta-lactamase (ESBL) that inactivates beta-lactam antibiotics by hydrolyzing the amide group of the beta- lactam ring. Displays high levels of penicillinase and cephalosporinase activity as well as measurable activity with carbapenems, including imipenem and meropenem. Plays a primary role in the intrinsic resistance of M.tuberculosis to beta-lactam…
Rv2107	PE22	-0.319039	Pe family protein pe22; Rv2107, (MTCY261.03), len: 98 aa. PE22, Member of mycobacterial PE family (see citation below). A core mycobacterial gene; conserved in mycobacterial strains (See Marmiesse et al., 2004)
Rv2138	lppL	-1.33187	Rv2138, (MTCY270.30c), len: 358 aa. Probable lppL,conserved lipoprotein, with appropriately placed lipoprotein signature (PS00013) strongly similar to hypothetical Mycobacterium leprae protein, Q49806. FASTA best: Q49806 B2126_F3_142. (298 aa) opt: 1495, E(): 0; (75.3% identity in 300 aa overlap)
Rv2190c	Rv2190c	-1.28771	Conserved hypothetical protein; Belongs to the peptidase C40 family
Rv2224c	caeA	0.081961	Probable carboxylesterase caea; Involved in virulence. Catalyzes the cleavage of ester bonds. Esterase activity increases with increasing carbon chain length of the substrate
Rv2253	Rv2253	-1.81821	Uncharacterized protein; Rv2253, (MTV022.03), len: 167 aa. Possible secreted protein; has potential N-terminal signal peptide. Predicted to be an outer membrane protein (See Song et al., 2008)
Rv2270	lppN	-1.02204	Probable lipoprotein lppn; Probably involved in bacterial recognition and uptake by its host (human)
Rv2289	cdh	-0.961039	Rv2289, (MTCY339.21c), len: 260 aa. Probable cdh,CDP-diacylglycerol pyrophosphatase, similar to CDH_SALTY|P26219 cdp-diacylglycerol pyrophosphatase (251 aa), FASTA scores: opt: 395, E(): 5.9e-20, (33.5% identity in 221 aa overlap)
Rv2301	cut2	-1.56004	Probable cutinase cut2; Rv2301, (MTCY339.08c), len: 230 aa. Probable cut2 (alternate gene name: cfp25), cutinase, highly similar to others from Mycobacteria tuberculosis e.g. MTCY13E12.04|Rv3451|O06318|CUT3_MYCTU (247 aa), FASTA scores: opt: 569, E(): 2.3e-27, (45.3% identity in 223 aa overlap); MT2037|MTCY39.35|RV1984C|Q10837|CUT1_MYCTU (217 aa), FASTA scores: opt: 383, E(): 3.4e-16 (42.9% ident…
Rv2345	Rv2345	-1.43704	Possible conserved transmembrane protein; May play a role in septum formation
Rv2349c	plcC	0.276294	Rv2349c, (MT2414, MTCY98.18c), len: 508 aa. Probable plcC, phospolipase C 3 (see citations below), similar to other precursors of several phospolipases C e.g. P15713|PHLN_PSEAE|PA3319 non-hemolytic phospholipase C precursor from Pseudomonas aeruginosa (692 aa), FASTA scores: opt: 1013, E(): 9.3e-54, (38.85% identity in 525 aa overlap); P06200|PHLC_PSEAE hemolytic phospholipase C precursor from Ps…
Rv2376c	cfp2	-0.795206	Low molecular weight antigen cfp2 (low molecular weight protein antigen 2) (cfp-2); May play a role in the development of protective immune responses
Rv2389c	rpfD	-1.21654	Probable resuscitation-promoting factor rpfd; Factor that stimulates resuscitation of dormant cells. Has peptidoglycan (PG) hydrolytic activity. Active in the pM concentration range. Has little to no effect on actively-growing cells. PG fragments could either directly activate the resuscitation pathway of dormant bacteria or serve as a substrate for endogenous Rpf, resulting in low molecular weig…
Rv2450c	rpfE	-1.40821	Probable resuscitation-promoting factor rpfe; Factor that stimulates resuscitation of dormant cells. Has peptidoglycan (PG) hydrolytic activity. Active in the pM concentration range. Has little to no effect on actively-growing cells. PG fragments could either directly activate the resuscitation pathway of dormant bacteria or serve as a substrate for endogenous Rpf, resulting in low molecular weig…
Rv2452c	Rv2452c	-0.792705	Uncharacterized protein; Rv2452c, (MTV008.08c), len: 48 aa. Hypothetical unknown protein (see citation below)
Rv2466c	Rv2466c	-1.19904	Conserved protein; In vitro, the reduced form of Rv2466c catalyzes the reduction and activation of TP053, which is a thienopyrimidine derivative drug that can kill both replicating and non-replicating M.tuberculosis
Rv2473	Rv2473	-1.02721	Possible alanine and proline rich membrane protein; Rv2473, (MTV008.29), len: 238 aa. Possible pro-,ala-rich membrane protein, with possible transmembrane domain around aa 81-104
Rv2515c	Rv2515c	-1.26054	Uncharacterized protein; Rv2515c, (MTCY07A7.21c), len: 415 aa. Conserved hypothetical protein, showing some similarity to Q9PG06|XF0496 hypothetical protein from Xylella fastidiosa (391 aa), FASTA scores: opt: 388, E(): 4.4e-18, (27.8% identity in 399 aa overlap). Contains PS00142 Neutral zinc metallopeptidases, zinc-binding region signature
Rv2518c	ldtB	0.574461	Probable l,d-transpeptidase ldtb; Generates 3->3 cross-links in peptidoglycan, catalyzing the cleavage of the mDap(3)-D-Ala(4) bond of a tetrapeptide donor stem and the formation of a bond between the carbonyl of mDap(3) of the donor stem and the side chain of mDap(3) of the acceptor stem. Is specific for donor substrates containing a stem tetrapeptide since it cannot use pentapeptide stems
Rv2520c	Rv2520c	-0.633206	Rv2520c, (MTV009.05c), len: 75 aa. Possible conserved membrane protein, equivalent to O07706|MLCL383.32 hypothetical 10.0 KDA protein from Mycobacterium leprae (91 aa), FASTA scores: opt: 290, E(): 4.1e-14, (58.65% identity in 75 aa overlap); and Q9CCU6|ML0425 putative membrane protein from Mycobacterium leprae (75 aa), FASTA scores: opt: 286, E(): 6.6e-14, (57.35% identity in 75 aa overlap). A c…
Rv2531c	Rv2531c	-0.765539	Rv2531c, (MTCY159.25), len: 947 aa. Probable amino acid decarboxylase, equivalent to Q9CCR8|adi|ML0524 putative amino acid decarboxylase from Mycobacterium leprae (950 aa), FASTA scores: opt: 5426, E(): 0, (86.45% identity in 951 aa overlap). Also similar to other amino acid decarboxylases (but longer in N-terminus) e.g. Q9I2S7|PA1818 probable ORN/ARG/LYS amino acid decarboxylase from Pseudomonas…
Rv2532c	Rv2532c	-0.258706	Uncharacterized protein; Rv2532c, (MTCY159.24), len: 133 aa. Hypothetical unknown protein, equivalent to AAK46918 from Mycobacterium tuberculosis strain CDC1551 but shorter 157 aa
Rv2553c	mltG	-0.150039	Probable conserved membrane protein; Functions as a peptidoglycan terminase that cleaves nascent peptidoglycan strands endolytically to terminate their elongation
Rv2563	Rv2563	1.72929	Uncharacterized ABC transporter permease Rv2563; Rv2563, (MTCY9C4.05c), len: 349 aa. Probable glutamine-transport transmembrane protein ABC transporter (see citation below), highly similar to O53617|Rv0072|MTV030.16 putative ABC-transporter transmembrane subunit from Mycobacterium tuberculosis (349 aa), FASTA scores: opt: 1772, E(): 1.1e-89, (76.2% identity in 349 aa overlap). Also some similarit…
Rv2597	Rv2597	1.76296	Uncharacterized protein Rv2597; Rv2597, (MTCY227.04c), len: 206 aa. Probable membrane protein. Predicted to be an outer membrane protein (See Song et al., 2008)
Rv2658c	Rv2658c	-0.81254	Possible prophage protein; Uncharacterized protein Rv2658c; Rv2658c, (MTCY441.27c), len: 120 aa. Hypothetical unknown protein, probably phage protein
Rv2660c	Rv2660c	-2.00271	Uncharacterized protein; Rv2660c, (MTCY441.29c), len: 75 aa (questionable orf). Hypothetical unknown protein
Rv2661c	Rv2661c	-0.353707	Uncharacterized protein; Rv2661c, (MTCY441.30c), len: 129 aa. Hypothetical unknown protein
Rv2673	aftC	0.576795	Possible arabinofuranosyltransferase aftc; Involved in the biosynthesis of the arabinogalactan (AG) region of the mycolylarabinogalactan-peptidoglycan (mAGP) complex, an essential component of the mycobacterial cell wall. Catalyzes the addition of an arabinofuranosyl (Araf) residue from the sugar donor decaprenyl-phospho-arabinose (DPA) on the C-3 of an alpha-(1->5)-linked Araf from the arabinan …
Rv2690c	Rv2690c	1.89963	Rv2690c, (MTCY05A6.11c), len: 657 aa. Probable conserved integral membrane ala-, val-, leu-rich protein,highly similar to others e.g. O54098|SC10A5.05 putative membrane protein from Streptomyces coelicolor (691 aa),FASTA scores: opt: 2007, E(): 1.6e-116, (62.35% identity in 669 aa overlap); O69917|SC3C8.04c putative integral membrane protein from Streptomyces coelicolor (644 aa),FASTA scores: opt…
Rv2710	sigB	-1.17054	Sigma factors are initiation factors that promote the attachment of RNA polymerase to specific initiation sites and are then released. A non-essential principal sigma factor that responds to cell envelope stress and hypoxia. Controls a regulon of about 40 genes, with another 100 genes expression being altered during SDS stress and about 50 gene being altered during diamide (oxidative) stress
Rv2728c	Rv2728c	-0.376372	Rv2728c, (MTCY154.08c), len: 231 aa. Conserved ala-rich protein, equivalent to Q49835|ML0994|B2235_C1_162 hypothetical protein from Mycobacterium leprae (232 aa),FASTA scores: opt: 1037, E(): 1.2e-54, (68.55% identity in 232 aa overlap). Also similar to O69964|SC4H2.09 from Streptomyces coelicolor (237 aa), FASTA scores: opt: 300,E(): 7.7e-11, (32.8% identity in 241 aa overlap); and some similari…
Rv2766c	Rv2766c	0.604461	Rv2766c, (MTV002.31c), len: 260 aa. Probable short-chain dehydrogenase/reductase , similar to others (from bacteria and eukaryota) e.g. Q9K3Y8|2SCG61.27c putative short chain oxidoreductase from Streptomyces coelicolor (253 aa), FASTA scores: opt: 722, E(): 7.4e-39,(44.75% identity in 248 aa overlap); Q93790|F54F3.4 hypothetical SDR protein from Caenorhabditis elegans (260 aa), FASTA scores: opt:…
Rv2780	ald	-2.07371	Secreted L-alanine dehydrogenase Ald (40 kDa antigen) (TB43); Catalyzes the reversible reductive amination of pyruvate to L-alanine. However, since the physiological environment of M.tuberculosis has a neutral pH, it can be assumed that the enzyme catalyzes exclusively the formation of L-alanine. May play a role in cell wall synthesis as L-alanine is an important constituent of the peptidoglycan …
Rv2784c	lppU	-0.123205	Rv2784c, (MTV002.49c), len: 171 aa. Probable lppU,lipoprotein, sharing no homology with other proteins. Contains signal sequence and appropriately positioned PS00013 Prokaryotic membrane lipoprotein lipid attachment site
Rv2843	Rv2843	-0.487205	Rv2843, (MTCY24A1.14c), len: 181 aa. Probable conserved transmembrane ala-rich protein, equivalent to Q9Z5J3|ML1560|MLCB596.10c hypothetical 17.5 KDA protein from Mycobacterium leprae (178 aa), FASTA scores: opt: 707,E(): 1.4e-32, (70.25% identity in 168 aa overlap). A core mycobacterial gene; conserved in mycobacterial strains (See Marmiesse et al., 2004)
Rv2864c	Rv2864c	-0.277372	Rv2864c, (MTV003.10c), len: 603 aa. Possible penicillin-binding lipoprotein, probably located in periplasm, equivalent to Q9CBU6|ML1577 probable penicillin binding protein from Mycobacterium leprae (608 aa), FASTA scores: opt: 3352, E(): 2.1e-193, (81.5% identity in 606 aa overlap). Also shows some similarity to others e.g. P72405|PCBR from Streptomyces clavuligerus (551 aa), FASTA scores: opt: 5…
Rv2873	mpt83	-0.605206	Cell surface lipoprotein mpt83 (lipoprotein p23); Recombinant, non-modified protein stimulates secretion of cytokines (TNF-alpha, IL-6 and IL-12p40) by mouse macrophage cell lines in a TLR2-dependent fashion, which leads to increased host innate immunity responses against the bacterium . Serves as a strong human and mouse antigen T cell antigen during M.tuberculosis infection, inducing strong IFN…
Rv2875	mpt70	-0.866206	Immunogenic protein MPT70; Rv2875, (MTCY274.06), len: 193 aa. Mpt70 (alternate gene name: mpb70), major secreted immunogenic protein MPT70 precursor (see citations below). Also similar to downstream ORF Q10790|MP83_MYCTU|MPT83|MPB83|Rv2873|MT2940|MTCY274.04 cell surface lipoprotein MPT83 precursor (lipoprotein P23) (220 aa), FASTA scores: opt: 806, E(): 1.2e-40, (70.25% identity in 185 aa overlap…
Rv2878c	mpt53	0.278628	Soluble secreted antigen mpt53 precursor; Disulfide oxidoreductase that catalyzes the oxidation of reduced, unfolded secreted proteins to form disulfide bonds. Despite a weak homology to thioredoxin this cannot serve as a substrate for thioredoxin reductase
Rv2891	Rv2891	2.03413	Uncharacterized protein Rv2891; Rv2891, (MTCY274.22), len: 249 aa (C-terminus overlaps neigbouring ORF). Conserved hypothetical protein,similar in N-terminus to O69910|SC2E1.40c hypothetical 22.8 KDA protein from Streptomyces coelicolor (226 aa), FASTA scores: opt: 315, E(): 3.4e-11, (40.7% identity in 145 aa overlap). Predicted to be an outer membrane protein (See Song et al., 2008)
Rv2905	lppW	-0.318039	Putative lipoprotein LppW; Rv2905, (MTCY274.36), len: 314 aa. Probable lppW,conserved ala-rich lipoprotein, with slight similarity to beta-lactamases and hypothetical proteins e.g. Q9S1P7|SCJ9A.23 hypothetical 36.3 KDA protein from Streptomyces coelicolor (336 aa), FASTA scores: opt: 222,E(): 2.8e-06, (25.5% identity in 298 aa overlap); O69914|SC3C8.01 putative secreted protein from Streptomyces …
Rv2911	dacB2	-0.428039	Probable penicillin-binding protein dacb2 (d-alanyl-d-alanine carboxypeptidase) (dd-peptidase) (dd-carboxypeptidase) (pbp) (dd-transpeptidase) (serine-type d-ala-d-ala carboxypeptidase) (d-amino acid...; Belongs to the peptidase S11 family
Rv2945c	lppX	0.165961	Probable conserved lipoprotein lppx; Might be involved in translocating phthiocerol dimycocerosates (PDIM) from the cell membrane to the outer membrane; PDIM forms part of the cell wall
Rv2972c	Rv2972c	-0.182206	Rv2972c, (MTCY349.15), len: 237 aa. Possible conserved membrane or exported protein, equivalent (but longer 52 aa) to O69461|MLCB1243.02 hypothetical 20.5 KDA protein from Mycobacterium leprae (180 aa), FASTA scores: opt: 581, E(): 8.2e-32, (55.75% identity in 174 aa overlap). Also similar to membrane or exported proteins e.g. Q9F2P3|SCE41.16C putative lipoprotein from Streptomyces coelicolor (25…
Rv3000	Rv3000	0.971961	Rv3000, (MTV012.14), len: 219 aa. Possible conserved transmembrane protein, similar to various membrane proteins e.g. P77307|YBBM_ECOLI|B0491 hypothetical 28.2 KDA protein (potential integral membrane protein) from Escherichia coli strain K12 (259 aa), FASTA scores: opt: 292, E(): 3.1e-11,(30.25% identity in 218 aa overlap); N-terminus of Q9BJF3 putative ABC transporter (fragment) from Sterkiella…
Rv3004	cfp6	0.641794	Rv3004, (MT3084.1, MTV012.18), len: 112 aa. Cfp6,low molecular weight protein antigen 6 (CFP-6) (See Bhaskar et al., 2000). Weak homology with Q9RKZ5|SC6D7.02 putative membrane protein from Streptomyces coelicolor (156 aa),FASTA scores: opt: 109, E(): 0.78, (39.4% identity in 122 aa overlap). Caution: the initiator methionine may be further upstream making the sequence a precursor. Predicted to b…
Rv3016	lpqA	0.778627	Rv3016, (MTV012.30), len: 209 aa. Probable lpqA,lipoprotein. Contains signal sequence and appropriately positioned PS00013 Prokaryotic membrane lipoprotein lipid attachment site
Rv3034c	Rv3034c	-0.266872	Possible transferase; Putative acetyltransferase that is probably involved in the biosynthesis of 6-O-methylglucosyl lipopolysaccharides (MGLP)
Rv3036c	TB22.2	-1.52171	Probable conserved secreted protein tb22.2; Hydrolyzes ester substrates carbon chain lengths ranging from C2 to C14 . In vitro, acetate (C2), butyrate (C4) and caprylate (C6) are hydrolyzed with high efficiency. Has lower activity against laurate (C12), myristate (C14) and caproate (C8), and weak activity against palmitate (C16)
Rv3044	fecB	-0.904373	Rv3044, (MTV012.59), len: 359 aa. Probable fecB,FeIII dicitrate-binding periplasmic lipoprotein (see citation below), equivalent to Q9CBQ4|FECB|ML1729 putative FEIII-dicitrate transporter lipoprotein from Mycobacterium leprae (364 aa), FASTA scores: opt: 1816, E(): 1.1e-96,(75.65% identity in 357 aa overlap); and Q9LA57|FECB from Mycobacterium avium (364 aa), FASTA scores: opt: 1769, E(): 5.1e-94…
Rv3054c	Rv3054c	-0.979206	Uncharacterized protein; Rv3054c, (MTCY22D7.28), len: 184 aa. Conserved hypothetical protein, similar to Q9RD22|SCM1.21 putative secreted protein from Streptomyces coelicolor (187 aa),FASTA scores: opt: 651, E(): 1.5e-33, (56.8% identity in 175 aa overlap). Also shares similarity with other hypothetical proteins and Chromate reductases e.g. AAK56853|CHRR from Pseudomonas putida (186 aa), FASTA sc…
Rv3090	Rv3090	4.08296	Unknown alanine and valine rich protein; Uncharacterized protein; Rv3090, (MTCY164.01), len: 295 aa. Unknown Ala-,Val-rich protein. Hydrophobic stretch at N-terminus
Rv3092c	Rv3092c	1.16663	Rv3092c, (MTCY164.03c), len: 306 aa. Probable conserved integral membrane protein, highly similar to Q9RUT5|DR1297 conserved hypothetical protein from Deinococcus radiodurans (311 aa), FASTA scores: opt: 941,E(): 9.8e-51, (55.65% identity in 309 aa overlap); Q9A8B8|CC1436 hypothetical protein from Caulobacter crescentus (314 aa), FASTA scores: opt: 791, E(): 1.6e-41,(46.9% identity in 305 aa over…
Rv3096	Rv3096	-1.01321	Uncharacterized protein; Rv3096, (MTCY164.07), len: 379 aa. Hypothetical protein, with slight similarity to several proteins e.g. Q09671|OYEB_SCHPO|SPAC5H10.10 putative NADPH dehydrogenase C5H10.10 (old yellow enzyme homolog) from Schizosaccharomyces pombe (Fission yeast) (392 aa), FASTA scores: opt: 125, E(): 1.1, (25.45% identity in 165 aa overlap); and Q12603|XYNA_DICTH beta-1,4-xylanase (endo…
Rv3103c	Rv3103c	2.46746	Hypothetical proline-rich protein; Rv3103c, (MTCY164.13c), len: 145 aa. Hypothetical unknown pro-rich protein, with some similarity to Proline-rich proteins e.g. Q39789 proline-rich cell wall protein from Gossypium hirsutum (Upland cotton) (214 aa),FASTA scores: opt: 267, E(): 0.00014, (40% identity in 110 aa overlap). Equivalent to AAK47525 from M. tuberculosis strain CDC1551 (158 aa) but shorte…
Rv3149	nuoE	-1.72204	Probable nadh dehydrogenase i (chain e) nuoe (nadh-ubiquinone oxidoreductase chain e); NDH-1 shuttles electrons from NADH, via FMN and iron-sulfur (Fe-S) centers, to quinones in the respiratory chain. The immediate electron acceptor for the enzyme in this species is believed to be menaquinone. Couples the redox reaction to proton translocation (for every two electrons transferred, four hydrogen i…
Rv3151	nuoG	-1.92204	Probable NADH dehydrogenase I (chain G) NuoG (NADH-ubiquinone oxidoreductase chain G); NDH-1 shuttles electrons from NADH, via FMN and iron-sulfur (Fe-S) centers, to quinones in the respiratory chain. The immediate electron acceptor for the enzyme in this species is believed to be menaquinone. Couples the redox reaction to proton translocation (for every two electrons transferred, four hydrogen i…
Rv3193c	Rv3193c	3.36396	UPF0182 protein Rv3193c; Rv3193c, (MTV014.37c), len: 992 aa. Probable conserved transmembrane protein, with hydrophobic N-terminal domain (~1-340 aa), highly similar to Q9CCM6|ML0644 putative integral membrane protein from Mycobacterium leprae (983 aa), FASTA scores: opt: 5421,E(): 0, (86.15% identity in 989 aa overlap); and O53609|Rv0064|MTV030.07 putative membrane protein from Mycobacterium tub…
Rv3194c	Rv3194c	0.0232943	Endopeptidase La; Rv3194c, (MTV014.38c), len: 340 aa. Possible conserved secreted protein (N-terminal stretch hydrophobic), equivalent to Q9CCM7|ML0643 putative secreted protein from Mycobacterium leprae (340 aa), FASTA scores: opt: 1822, E(): 1.6e-102, (80.3% identity in 340 aa overlap). Also similar to other proteins e.g. Q9FCI6|2SC3B6.26 putative secreted protein from Streptomyces coelicolor (…
Rv3239c	Rv3239c	1.02429	Probable conserved transmembrane transport protein; Belongs to the major facilitator superfamily
Rv3267	Rv3267	-1.46821	Rv3267, (MTCY71.07), len: 498 aa. Conserved protein,CPSA-related protein, equivalent to Q9CCK9|ML0750 hypothetical protein from Mycobacterium leprae (489 aa),FASTA scores: opt: 2523, E(): 5e-138, (78.9% identity in 498 aa overlap); and Q50160|CPSA (hypothetical protein CPSA) from Mycobacterium leprae (516 aa), FASTA scores: opt: 868, E(): 1.2e-42, (34.7% identity in 507 aa overlap). Also similar …
Rv3271c	Rv3271c	0.432461	Rv3271c, (MTCY71.11c), len: 222 aa. Probable conserved integral membrane protein, similar to others e.g. Q9RD35|SCM1.07c from Streptomyces coelicolor (230 aa),FASTA scores: opt: 360, E(): 4.7e-16, (33.85% identity in 195 aa overlap); Q9X897|SCE2.02c from Streptomyces coelicolor (234 aa), FASTA scores: opt: 357, E(): 7.3e-16,(33.85% identity in 195 aa overlap); Q9D0E0 2610024A01RIK protein from Mu…
Rv3273	Rv3273	-0.227539	Rv3273, (MTCY71.13), len: 764 aa. Probable transmembrane protein (N-terminal part is hydrophobic) with probable carbonic anhydrase activity (in C-terminal part). Possibly involved in transport of sulfate. Equivalent to Q9CBA3|ML2279 putative transmembrane transport protein from Mycobacterium leprae (496 aa), FASTA scores: opt: 1637,E(): 1.8e-89, (59.15% identity in 487 aa overlap). Similar to var…
Rv3276c	purK	-1.45437	Probable phosphoribosylaminoimidazole carboxylase atpase subunit purk (air carboxylase) (airc); Catalyzes the ATP-dependent conversion of 5-aminoimidazole ribonucleotide (AIR) and HCO(3)(-) to N5-carboxyaminoimidazole ribonucleotide (N5-CAIR)
Rv3312A	mtp	-0.785205	Secreted protein antigen; Structural subunit of M.tuberculosis pili (MTP), which are thin (2- to 3-nm wide), flexible, coiled-coil, aggregative fibers. Has a strong affinity for laminin but lacks significant binding affinity for fibronectin or type IV collagen. Mediates adhesion to the extracellular matrix, an event that would facilitate direct interaction with the host epithelium during infectio…
Rv3330	dacB1	0.0101282	Probable penicillin-binding protein dacb1 (d-alanyl-d-alanine carboxypeptidase) (dd-peptidase) (dd-carboxypeptidase) (pbp) (dd-transpeptidase) (serine-type d-ala-d-ala carboxypeptidase) (d-amino acid...; Belongs to the peptidase S11 family
Rv3333c	Rv3333c	-0.716873	Hypothetical proline rich protein; Rv3333c, (MTV016.33c), len: 281 aa. Hypothetical unknown pro-rich protein. Equivalent to AAK47780 hypothetical protein from Mycobacterium tuberculosis strain CDC1551 (265 aa) but longer 16 aa. Predicted to be an outer membrane protein (See Song et al., 2008)
Rv3334	Rv3334	-1.12571	Rv3334, (MTV016.34), len: 146 aa. Probable transcriptional regulator, similar to many regulatory proteins (notably mercury resistance operon regulators) e.g. Q9HXV1|PA3689 probable transcriptional regulator MerR family from Pseudomonas aeruginosa (156 aa), FASTA scores: opt: 275, E(): 1.6e-11, (35.95% identity in 139 aa overlap); Q9AKR6|PBRR lead resistance operon regulator from Ralstonia metalli…
Rv3365c	Rv3365c	-2.02737	Histidine kinase; Rv3365c, (MTV004.22c), len: 876 aa. Conserved protein, similar to various proteins from Streptomyces coelicolor e.g. O86525|SC1C2.25c hypothetical 139.7 KDA protein (similar to other prokaryotic sensory transduction histidine kinases) (1329 aa), FASTA scores: opt: 879, E(): 5.4e-32, (29.9% identity in 924 aa overlap) (similarity in N-terminal part for this one); O86522|SC1C2.21c…
Rv3413c	rsdA	0.133461	Unknown alanine and proline rich protein; An anti-sigma factor for extracytoplasmic function (ECF) sigma factor SigD. ECF sigma factors are held in an inactive form by an anti-sigma factor until released by regulated intramembrane proteolysis (RIP). RIP occurs when an extracytoplasmic signal triggers a concerted proteolytic cascade to transmit information and elicit cellular responses. The membra…
Rv3418c	groES	-0.161039	10 kDa chaperonin GroES (protein CPN10) (protein GroES) (BCG-a heat shock protein) (10 kDa antigen); Binds to Cpn60 in the presence of Mg-ATP and suppresses the ATPase activity of the latter
Rv3449	mycP4	-0.395539	Mycosin-4; Belongs to the peptidase S8 family
Rv3450c	eccB4	0.25746	Esx conserved component eccb4. esx-4 type vii secretion system protein. probable membrane protein.; An ATPase (By similarity)
Rv3484	cpsA	-1.13021	Rv3484, (MTCY13E12.37), len: 512 aa. Possible cpsA,hypothetical protein, equivalent to Q50160|CPSA|ML2247 hypothetical protein CPSA from Mycobacterium leprae (516 aa), FASTA scores: opt: 2557, E(): 1.6e-143, (74.9% identity in 518 aa overlap); and with good similarity to Q9CCK9|ML0750 hypothetical protein from Mycobacterium leprae (489 aa), FASTA scores: opt: 855, E(): 4.6e-43,(34.45% identity in…
Rv3485c	Rv3485c	-0.0392047	Rv3485c, (MTCY13E12.38c), len: 314 aa. Probable short-chain dehydrogenase/reductase, similar, but longer 41 aa, to P71824|Rv0769|MTCY369.14 putative short-chain type dehydrogenase/reductase CY369.14 from Mycobacterium tuberculosis (248 aa), FASTA scores: opt: 462, E(): 1.8e-19, (34.0% identity in 253 aa overlap). Also similar to various dehydrogenases e.g. P25529|HDHA_ECOLI|HSDH|B1619 NAD-depende…
Rv3491	Rv3491	-0.184705	Uncharacterized protein; Rv3491, (MTCY13E12.44), len: 192 aa. Unknown protein. No significant homology with other proteins
Rv3492c	Rv3492c	-0.626039	Rv3492c, (MTCY13E12.45c), len: 160 aa. Conserved hypothetical Mce-associated protein, showing some similarity to hypothetical Mycobacterium tuberculosis proteins e.g. O53974|Rv1973|MTV051.11 (near Mce operon 3) (160 aa), FASTA scores: opt: 214, E(): 2.6e-07, (25.3% identity in 154 aa overlap); and Q11032|YD62_MYCTU|Rv1362c|MT1407|MTCY02B10.26c (220 aa),FASTA scores: opt: 187, E(): 2e-05, (23.4% i…
Rv3493c	Rv3493c	-1.51054	Conserved hypothetical mce associated alanine and valine rich protein; Rv3493c, (MTCY13E12.46c), len: 242 aa. Conserved hypothetical Mce-associated ala-, val-rich protein, showing weak similarity to O07422|Z97050|Rv0178|MTCI28.18 hypothetical 25.9 KDA protein (near Mce operon1) from Mycobacterium tuberculosis (244 aa), FASTA scores: opt: 163, E(): 0.046, (24.65% identity in 211 aa overlap)
Rv3495c	lprN	1.45296	Possible mce-family lipoprotein lprn (mce-family lipoprotein mce4e); Stimulates the host (mouse) immune response; lipidated protein produced in E.coli stimulates T-cell proliferation in mice previously sensitized with LprN. Spleenocytes from these mice produce increased amounts of TNF-alpha and IFN-gamma, as well as somewhat increased nitric oxide levels, upon subsequent challenge with LprN. Prev…
Rv3496c	mce4D	-0.218705	Mce-family protein Mce4D; Rv3496c, (MTV023.03c), len: 451 aa. Mce4D; belongs to 24-membered Mycobacterium tuberculosis Mce protein family (see citations below), highly similar to Mycobacterium tuberculosis proteins O07416|Rv0172|MTCI28.12|mce1D (530 aa); O07786|Rv0592|MTCY19H5.30c|mce2D (508 aa); and O53970|Rv1969|MTV051.07|mce3D (423 aa). Also similar to others e.g. Q9CD11|MCE1D|ML2592 putative …
Rv3584	lpqE	2.08996	Putative lipoprotein LpqE; Rv3584, (MTV024.02), len: 182 aa. Possible lpqE,conserved lipoprotein, equivalent to Q9ZBM7|MLCB1450.02|LPQE|ML0319 putative lipoprotein from Mycobacterium leprae (183 aa), FASTA scores: opt: 722, E(): 6.2e-37, (63.45% identity in 175 aa overlap). Also similar in part to Q9KK69 exported protein 996A010 (fragment) from Mycobacterium avium (41 aa), FASTA scores: opt: 180,…
Rv3605c	Rv3605c	-0.0615393	Rv3605c, (MTCY07H7B.17), len: 158 aa. Probable conserved secreted or membrane protein, identical to O69527|MLCB2548.04c|ML0227 putative membrane protein from Mycobacterium leprae (158 aa), FASTA scores: opt: 944, E(): 2.6e-56, (85.45% identity in 158 aa overlap). Also similar to other proteins e.g. Q9X8I2|SCE9.09 possible secreted protein from Streptomyces coelicolor (162 aa), FASTA scores: opt: …
Rv3616c	espA	1.72463	ESX-1 secretion-associated protein A, EspA; Required for secretion of EsxA (ESAT-6) and EsxB (CFP-10) and for virulence. Involved in translocation of bacteria from the host (human) phagolysosome to the host cytoplasm
Rv3623	lpqG	2.13029	Rv3623, (MTCY15C10.29c), len: 240 aa. Probable lpqG,conserved lipoprotein, showing some similarity with hypothetical proteins e.g. Q57432 from Methanosarcina barkeri (251 aa), FASTA scores: opt: 319, E(): 6.8e-12,(31.2% identity in 218 aa overlap); Q9PEA5|XF1123 outer membrane protein from Xylella fastidiosa (242 aa) FASTA scores: opt: 312, E(): 1.7e-11, (28.25% identity in 237 aa overlap); BAB49…
Rv3635	Rv3635	-1.09404	Rv3635, (MTCY15C10.17c), len: 591 aa (start unclear). Probable conserved transmembrane protein,equivalent, but longer 25 aa, to O69545|ML0203|MLCB2548.28 putative membrane protein from Mycobacterium leprae (569 aa), FASTA scores: opt: 2933, E(): 4.6e-173, (77.0% identity in 569 aa overlap)
Rv3668c	Rv3668c	2.59146	Possible protease; Rv3668c, (MTV025.016c), len: 232 aa. Possible protease (and more specifically a putative alkaline serine protease, equivalent to Q9CB98|ML2295 hypothetical protein from Mycobacterium leprae (234 aa), FASTA scores: opt: 1249, E(): 7.4e-66, (77.5% identity in 231 aa overlap). Also similar at C-terminal end with many proteases e.g. O86984 alkaline serine protease precursor from Th…
Rv3683	Rv3683	-1.75104	Conserved protein; Rv3683, (MTV025.031), len: 319 aa. Conserved protein, equivalent to Q9CB84|ML2309 hypothetical protein from Mycobacterium leprae (330 aa) FASTA scores: opt: 1791,E(): 9e-107, (85.45% identity in 296 aa overlap). Also similar to Q9X935|SCH66.03 conserved hypothetical protein from Streptomyces coelicolor (309 aa) FASTA scores: opt: 610, E(): 1.4e-31, (51.45% identity in 307 aa ov…
Rv3705c	Rv3705c	-1.44204	Conserved protein; Rv3705c, (MTV025.053c), len: 214 aa. Conserved protein, equivalent to Q9CB80|ML2320 hypothetical protein from Mycobacterium leprae (215 aa) FASTA scores: opt: 1145,E(): 5.9e-68, (79.45% identity in 214 aa overlap). Some similarity to the C-terminal end of Q11053|PKNH_MYCTU|Rv1266c|MT1304|MTCY50.16 probable serine/threonine-protein from Mycobacterium tuberculosis (626 aa), FASTA…
Rv3706c	Rv3706c	-2.06387	Rv3706c, (MTV025.054c), len: 106 aa. Conserved ypothetical pro-rich protein, similar to upstream ORF Rv3705A (129 aa), and AAK48176|MT3808.1 hypothetical 13.0 KDA protein from Mycobacterium tuberculosis strain CDC1551 (129 aa), FASTA scores: opt: 245, E(): 4.4e-06, (40.7% identity in 113 aa overlap)
Rv3714c	Rv3714c	0.408295	Uncharacterized protein; Rv3714c, (MTV025.062c), len: 296 aa. Conserved hypothetical protein, highly similar to O07396|MAV346 MAV346 protein from Mycobacterium avium (346 aa) FASTA scores: opt: 834, E(): 2.2e-46, (50.0% identity in 286 aa overlap); and also highly similar to several proteins from Mycobacterium tuberculosis e.g. O53421|Rv1073|MTV017.26 (283 aa), FASTA scores: opt: 869, E(): 1e-48,…
Rv3717	Rv3717	-0.704706	Conserved hypothetical protein; Cell-wall hydrolase that hydrolyzes the amide bond between N- acetylmuramic acid and L-alanine in cell-wall glycopeptides . Is able to hydrolyze the cell walls of several bacterial species (i.e. Paenibacillus sp., B.avium, E.coli DH5alpha, E.aerogenes, L.acidophilus, B.thuringiensis, B.pumilus, B.subtilis and E.coli W3110), thereby showing that it is a cell-wall hy…
Rv3725	Rv3725	-0.482206	Rv3725, (MTV025.073), len: 309 aa. Possible reductase, similar to various oxidoreductases and hypothetical proteins e.g. O34285|HPNA HPNA protein from Zymomonas mobilis (337 aa), FASTA scores: opt: 317, E(): 6.1e-11, (30.5% identity in 272 aa overlap); Q9SZB3|F17M5.120|AT4G33360|AAK49584 hypothetical 37.9 KDA protein from Arabidopsis thaliana (Mouse-ear cress) (344 aa), FASTA scores: opt: 314, E(…
Rv3732	Rv3732	-0.931206	Conserved protein; Rv3732, (MTV025.080), len: 352 aa. Conserved protein. The region between aa 175-352 is highly similar to the region between aa 72-257 of Q9KH39 hypothetical 55.5 KDA protein from Mycobacterium smegmatis (511 aa), FASTA scores: opt: 1122, E(): 7.3e-63, (98.85% identity in 176 aa overlap). Also shows some similarity with Q55304 hypotheticalk protein from Synechocystis sp. strain …
Rv3738c	PPE66	0.234294	Uncharacterized PPE family protein PPE66; Rv3738c, (MTV025.086c), len: 315 aa. PPE66, Member of the Mycobacterium tuberculosis PPE family, highly similar to many e.g. O53265|Rv3018c|MTV012.32c (434 aa),FASTA scores: opt: 464, E(): 2.2e-17, (47.05% identity in 338 aa overlap). Probably a continuation of the upstream ORF MTV025.87c|Rv3739c|PPE67. At position 97470-72 a stop codon is present which i…
Rv3763	lpqH	1.29263	19 kDa lipoprotein antigen precursor LpqH; Based on its structure might be involved in ligand transport (By similarity)
Rv3771c	Rv3771c	0.458961	Conserved hypothetical protein; Uncharacterized protein; Rv3771c, (MTCY13D12.05c), len: 108 aa. Hypothetical protein, highly similar, but shorter 81 aa, to P71640|Rv2811|MTCY16B7.32c hypothetical 21.1 KDA protein from Mycobacterium tuberculosis (202 aa), FASTA scores: opt: 469, E(): 2.7e-25, (73.15% identity in 108 aa overlap)
Rv3792	aftA	-0.669539	Arabinofuranosyltransferase afta; Involved in the biosynthesis of the arabinogalactan (AG) region of the mycolylarabinogalactan-peptidoglycan (mAGP) complex, an essential component of the mycobacterial cell wall. Catalyzes the addition of the first key arabinofuranosyl (Araf) residue from the sugar donor decaprenyl-phospho-arabinose (DPA) on the C-5 of a 6-linked galactofuranosyl (Galf) of the ga…
Rv3802c	Rv3802c	2.85413	Rv3802c, (MTV026.07c), len: 336 aa. Probable conserved membrane protein, with a N-terminal signal sequence followed by Pro-rich region. Equivalent to Q9CDB3|ML0099 hypothetical protein from Mycobacterium leprae (336 aa) FASTA scores: opt: 1759, E(): 1.1e-85,(75.5% identity in 335 aa overlap). A core mycobacterial gene; conserved in mycobacterial strains (See Marmiesse et al., 2004). Predicted to …
Rv3803c	fbpD	-1.46104	MPT51/MPB51 antigen; May have a role in host tissue attachment, whereby ligands may include the serum protein fibronectin and small sugars
Rv3804c	fbpA	-0.265205	Diacylglycerol acyltransferase/mycolyltransferase ag85a; The antigen 85 proteins (FbpA, FbpB, FbpC) are responsible for the high affinity of mycobacteria for fibronectin, a large adhesive glycoprotein, which facilitates the attachment of M.tuberculosis to murine alveolar macrophages (AMs). They also help to maintain the integrity of the cell wall by catalyzing the transfer of mycolic acids to cel…
Rv3807c	Rv3807c	0.336795	Possible conserved transmembrane protein; Involved in the biosynthesis of decaprenylphosphoryl arabinose (DPA) a precursor for arabinan synthesis in mycobacterial cell wall biosynthesis. Could be involved in the dephosphorylation of decaprenylphosphoryl-5-phosphoribose (DPPR) to decaprenyl-phospho- ribose (DPR) (By similarity)
Rv3826	fadD23	-0.397539	Probable fatty-acid-amp ligase fadd23 (fatty-acid-amp synthetase) (fatty-acid-amp synthase); Catalyzes the activation of long-chain fatty acids as acyl- coenzyme A (acyl-CoA), which are then transferred to the multifunctional polyketide synthase (PKS) type III for further chain extension (Probable). Involved in the biosynthesis of sulfolipid 1 (SL- 1)
Rv3849	espR	-0.171538	ESX-1 transcriptional regulatory protein EspR; Virulence regulator that has both architectural and regulatory roles. Impacts cell wall functions and pathogenesis through regulation of multiple genes, including the espACD operon, which is a key ESX-1 component. Influences target gene expression positively or negatively, depending on its binding position relative to the genes it controls. Acts by b…
Rv3852	hns	-0.843373	Rv3852, (MTCY01A6.16c), len: 134 aa. Possible hns,histone-like protein, equivalent to Q9CDD1|HNS|ML0067 histone-like protein from Mycobacterium leprae (121 aa),FASTA scores: opt: 341, E(): 4.3e-09, (51.5% identity in 134 aa overlap). Shows some similarity with other histone-like proteins e.g. O65795|HIS1 histone H1 from Triticum aestivum (Wheat) (288 aa), FASTA scores: opt: 183,E(): 0.091, (34.85…
Rv3864	espE	1.41346	Rv3864, (MTCY01A6.04c), len: 402 aa. EspE, ESX-1 secretion-associated protein, similar to Q49722|ML0405|B1620_C2_213|MLCL383.01 hypothetical 40.8 KDA protein from Mycobacterium leprae (394 aa) FASTA scores: opt: 397, E(): 1.2e-12, (31.0% identity in 410 aa overlap). Also similar to various proteins from several organisms e.g. Q9VYF9|CG12723 hypothetical protein from Drosophila melanogaster (Fruit…
Rv3869	eccB1	0.582795	Esx conserved component eccb1. esx-1 type vii secretion system protein. possible membrane protein.; An ATPase . Part of the ESX-1 specialized secretion system, which delivers several virulence factors to host cells during infection, including the key virulence factors EsxA (ESAT- 6) and EsxB (CFP-10)
Rv3874	esxB	-1.19287	10 kDa culture filtrate antigen EsxB (LHP) (CFP10); A secreted protein. Acts as a strong host (human) T-cell antigen . Involved in translocation of bacteria from the host (human) phagolysosome to the host cytoplasm . Might serve as a chaperone to prevent uncontrolled membrane lysis by its partner EsxA; native protein binds poorly to artificial liposomes in the absence or presence of EsxA . EsxA a…
Rv3875	esxA	-1.04704	6 kDa early secretory antigenic target EsxA (ESAT-6); A secreted protein that plays a number of roles in modulating the host's immune response to infection as well as being responsible for bacterial escape into the host cytoplasm. Acts as a strong host (human) T-cell antigen . Inhibits IL- 12 p40 (IL12B) and TNF-alpha expression by infected host (mouse) macrophages, reduces the nitric oxide respo…
Rv3880c	espL	-1.24004	ESX-1 secretion-associated protein EspL; Probably plays a role in host phagosome maturation arrest
Rv3881c	espB	-0.644372	Secreted esx-1 substrate protein b, espb. conserved alanine and glycine rich protein; Required for host-cell death and may support an EsxA- independent virulence function . Secreted processed form of EspB binds to phosphatidic acid and phosphatidylserine . Inhibits IFN-gamma-induced autophagy in murine macrophages
Rv3882c	eccE1	-0.754039	Esx conserved component ecce1. esx-1 type vii secretion system protein. possible membrane protein.; Part of the ESX-1 specialized secretion system, which delivers several virulence factors to host cells during infection, including the key virulence factors EsxA (ESAT-6) and EsxB (CFP-10)
