# Supplementary material for: Pathogenic mycobacteria suppress host antimicrobial peptides by dehydrogenating L-alanine
Source: Research Square preprint supplement (doi:10.21203/rs.3.rs-3367542/v1), 2023-09-22
Supplement: Supplementary file 6 [file fe94d63b33910e5134ce4d4f.xlsx]

## Sheet: Sheet1
Supplementary Table 7. Strain, plasmids and primers used in this study.
Name (Strains/Plasmids/Primers)	Description	Reference
Strain-E. coli DH5α	F- φ80lacZ△M15△ (lacZYA-argF) U169 endA1 recA1hsdR17(rk-,mk+) supE44λ- thi-1 gyrA96 relA1 phoA	Tiangen
Strain-E.coli BL21	F- ompT hsdSB(rB- mB-) gal dcm（DE3）	Tiangen
Strain-M. tuberculosis	H37Rv	ATCC#27294
Strain-H37RvΔRv2780	Rv2780 gene knockout strain	Shanghai Gene-optimal Science & Technology Co., Ltd
Strain-H37RvΔRv2780+Rv2780	H37RvΔRv2780 complementary strain with wild-type Rv2780	This study
Strain-H37RvΔRv2780+Rv2780DM	H37RvΔRv2780 complementary strain with Rv2780(H96A, D70A)	This study
Plasmid-pMV261-Rv2780	For overexpression of Rv2780 in ∆Rv2780	This study
Plasmid-pMV261-Rv2780DM	For overexpression of Rv2780(H96A, D70A) in ∆Rv2780	This study
Plasmid-pET-28a-Rv2780	For expression of His-Rv2780 in E.coli BL21	This study
Plasmid-pET-28a--Rv2780DM	For overexpression of Rv2780(H96A, D70A) in ∆Rv2780	This study
Plasmid-pcDNA3.0-FLAG-PRSS1	For expression of FLAG-PRSS1 in mammalian cells	This study
Plasmid-pcDNA3.1-myc-PRSS1	For expression of Myc-PRSS1 in mammalian cells	This study
Plasmid-pcDNA3.0-FLAG-TRAF6	For expression of FLAG-TRAF6 in mammalian cells	L. Wang
Plasmid-pcDNA3.0-FLAG-TAK1	For expression of FLAG-TAK1 in mammalian cells	L. Wang
Plasmid-pcDNA3.0-HA-TAK1	For expression of HA-TRAF6 in mammalian cells	L. Wang
Plasmid-pcDNA3.0-FLAG-TAB1	For expression of FLAG-TAB1 in mammalian cells	L. Wang
Plasmid-pcDNA3.0-TAB1	For expression of TAB1 in mammalian cells	L. Wang
Plasmid-pcDNA3.0-FLAG-IKKα	For expression of FLAG-IKKα in mammalian cells	This study
Plasmid-pNF-κB-luc	Used in dual-luciferase assay for NF-κB pathway	F. Shao
Plasmid-pRL-TK	Used in dual-luciferase assay for AP-1 and NF-κB pathway	F. Shao
Plasmid-pLKO.1 puro	For knockdown gene in mammalian cells (or as control vactor)	Addgene plasmid # 8453
Plasmid-pLKO.1-Prss1 (mouse)	For knockdown gene in mammalian cells	This study
Plasmid-psPAX2	For generation lentiviral packaging plasmid	Addgene plasmid # 12260
Plasmid-pMD2.G	For generation lentiviral packaging plasmid	Addgene plasmid # 12259
Primer-cathelicidin(mouse)-F	ACGAGGATCCAGATACTCCCAAGT
Primer-cathelicidin(mouse)-R	TTCCTTGAAGGCACATTGCTCAGG
Primer-Defb3(mouse)-F	AGATGCTGGAATCGGTGCAT
Primer-Defb3(mouse)-R	TGCAGCATTTGAGGAAAGGAAC
Primer-Defb4(mouse)-F	CTCCACTTGCAGCCTTTACC
Primer-Defb4(mouse)-R	GTCGAAAAGCGGTAGGGCAC
Primer-Hamp(mouse)-F	AAGCAGGGCAGACATTGCGAT
Primer-Hamp(mouse)-R	CAGGATGTGGCTCTAGGCTAT
Primer-cathelicidin(Human)-F	TGATGCCTCTGGCCATCATT
Primer-cathelicidin(Human)-R	GAGGTTAGCATCCGAGGAC
Primer-Defb103(Human)-F	CCTGTTTTTGGTGCCTGTTCC
Primer-Defb103(Human)-R	CCGCCTCTGACTCTGCAATA
Primer-Defb4(Human)-F	ACCTGCCTTAAGAGTGGAGC
Primer-Defb4(Human)-R	TTGCAGCATTTTGTTCCAGGG
Primer-Hamp(Human)-F	TTTTCCCACAACAGACGGGA
Primer-Hamp(Human)-R	CTCCTTCGCCTCTGGAACAT
